1 **A targeted multi-omic analysis approach measures protein**  
2 **expression and low abundance transcripts on the single cell level**

3

4 Florian Mair\*<sup>1</sup>, Jami R. Erickson\*<sup>1</sup>, Valentin Voillet<sup>1</sup>, Yannick Simoni<sup>1</sup>, Timothy Bi<sup>1</sup>, Aaron  
5 J. Tyznik<sup>2</sup>, Jody Martin<sup>2</sup>, Raphael Gottardo<sup>1,3#</sup>, Evan W. Newell<sup>1#</sup> and Martin Prlic<sup>1,4#</sup>

6

7 \*These authors contributed equally

8

9 <sup>1</sup> Fred Hutchinson Cancer Research Center, Vaccine and Infectious Disease Division,  
10 Seattle, WA 98109, USA

11 <sup>2</sup> BD Biosciences, La Jolla, CA 92037, USA

12 <sup>3</sup> Fred Hutchinson Cancer Research Center, Public Health Sciences Division, Seattle,  
13 WA 98109, USA

14 <sup>3</sup> Department of Statistics, University of Washington, Seattle, WA 98195, USA

15 <sup>4</sup> Department of Global Health and Department of Immunology, University of  
16 Washington, Seattle, WA 98195

17

18 # Corresponding authors:

19 Raphael Gottardo: [rgottard@fredhutch.org](mailto:rgottard@fredhutch.org)

20 Evan Newell: [enewell@fredhutch.org](mailto:enewell@fredhutch.org)

21 Martin Prlic: [mprlic@fredhutch.org](mailto:mprlic@fredhutch.org)

22

- 23 **Keywords:** sc-RNA sequencing, multi-omic, AbSeq, high-dimensional cytometry,  
24 human immunology

25 **Summary (150 words)**

26 High throughput single-cell RNA sequencing (sc-RNAseq) has become a frequently  
27 used tool to assess immune cell function and heterogeneity. Recently, the combined  
28 measurement of RNA and protein expression by sequencing was developed, which is  
29 commonly known as CITE-Seq. Acquisition of protein expression data along with  
30 transcriptome data resolves some of the limitations inherent to only assessing  
31 transcript, but also nearly doubles the sequencing read depth required per single cell.  
32 Furthermore, there is still a paucity of analysis tools to visualize combined transcript-  
33 protein datasets.

34 Here, we describe a novel targeted transcriptomics approach that combines analysis  
35 of over 400 genes with simultaneous measurement of over 40 proteins on more than  
36 25,000 cells. This targeted approach requires only about 1/10 of the read depth  
37 compared to a whole transcriptome approach while retaining high sensitivity for low  
38 abundance transcripts. To analyze these multi-omic transcript-protein datasets, we  
39 adapted One-SENSE for intuitive visualization of the relationship of proteins and  
40 transcripts on a single-cell level.

41

## 42 **Introduction**

43 While pioneering work almost 20 years ago illustrated the ability to study the  
44 transcriptome at the single-cell level (Chiang and Melton, 2003; Phillips and Eberwine,  
45 1996), recent advances in microfluidics and reagents allow the high-throughput  
46 analysis of transcripts of  $10^4$  single cells in one experiment (Jaitin et al., 2014; Klein et  
47 al., 2015; Macosko et al., 2015). Although several methods have been developed for  
48 this purpose, currently the most widely adopted platform is a droplet-based  
49 microfluidic system commercialized by 10x Genomics (Zheng et al., 2017).

50 Though analysis of transcript expression on the single cell level is a powerful tool to  
51 characterize the relationship and functional properties of cells, it is imperative to  
52 consider the relationship between transcript and protein when trying to extrapolate  
53 biology. Typically, transcripts are expressed at a much lower level than proteins – for  
54 example, murine liver cells have a median copy number of 43,100 protein molecules  
55 but only 3.7 RNA molecules per gene (Azimifar et al., 2014). Similarly, the dynamic  
56 range of expression is much greater for proteins with copy numbers spanning about 6-  
57 7 orders of magnitude while transcript copy numbers span about 2 orders of  
58 magnitude (Schwanhausser et al., 2011). Finally, the correlation of gene expression and  
59 protein expression has been estimated to have a Pearson correlation coefficient  
60 between 0.4 (Schwanhausser et al., 2011) and 0.6 (Azimifar et al., 2014). These  
61 discrepancies in transcript and protein expression patterns are relevant for the  
62 biological interpretation of single cell transcriptome data, but also pose analytical  
63 challenges. Suitable approaches are required to visualize the data despite the  
64 pronounced differences in abundance and dynamic range of expression.

65 The parallel measurement of transcript and protein phenotype by sequencing has been  
66 recently reported as cellular indexing of transcriptomes and epitopes (CITE-seq)  
67 (Stoeckius et al., 2017) or RNA expression and protein sequencing (REAP-seq)  
68 (Peterson et al., 2017). These technologies leverage existing sc-RNAseq platforms that  
69 use an unbiased whole transcriptome (WTA) detection approach capturing cellular  
70 mRNA via its poly-A tail, and utilize oligonucleotide-labelled antibodies (carrying unique  
71 barcodes and also a poly-A tail) to interrogate surface protein abundance. Typically,  
72 current droplet-based WTA approaches result in the detection of ~1000 unique  
73 transcripts per single cell for the transcriptome (with a substantial fraction of these  
74 transcripts encoding ribosomal proteins), while antibody panels of up to 80 targets  
75 have been reported (Peterson et al., 2017).

76 Though proof-of-principle for this technology has been established, it remains unclear  
77 how the sequencing-based antibody detection compares to established flow  
78 cytometry-based assays in different experimental settings with regards to capturing the  
79 dynamic range of protein expression and identifying low abundance protein  
80 expression. In addition, the combined WTA plus protein approach can quickly become  
81 resource intensive. Finally, droplet-based WTA pipelines may still miss specific  
82 transcripts of interest if they are below the limit of detection, with current high  
83 throughput chemistries capturing an estimated 10% of the total cellular mRNA (Zheng  
84 et al., 2017).

85 Here, we report using a high throughput ( $>10^4$  single cells) targeted transcriptomic  
86 approach employing nanowells to capture single cells (Rhapsody platform,  
87 commercialized by BD Biosciences) (Fan et al., 2015) in combination with

88 oligonucleotide-barcoded antibodies (termed AbSeq). Specifically, we simultaneously  
89 interrogated over 400 immune-related genes and 41 surface proteins that are  
90 commonly used for immunophenotyping. We found that this targeted approach was  
91 efficient at detecting low-abundance transcripts while only requiring about 1/10 of the  
92 sequencing read depth needed for WTA, indicating that targeted transcriptomics is a  
93 sensitive and cost-efficient alternative when the focus is on interrogating defined  
94 transcripts. Of note, this approach clearly separated different memory T cell subsets as  
95 well as regulatory T cells (Tregs) solely based on transcript information, which is often  
96 difficult due to the low amount of RNA recovered from T lymphocytes (Zheng et al.,  
97 2017). Furthermore, we used 30-parameter fluorescent-based flow cytometry to  
98 measure the same proteins targets as in the multi-omic assay. Our data indicate that  
99 the validation of oligonucleotide-barcoded antibody panels is necessary for meaningful  
100 interpretation of the multi-omic data.

101 To demonstrate the sensitivity and robustness of the system we analyzed T and NK  
102 cells before and after one hour of stimulation, revealing an unexpected disconnect in  
103 transcript and surface expression levels of the commonly used early activation marker  
104 CD69. Analysis of chemokine expression showed distinct phenotypes within the CD8<sup>+</sup>  
105 T cell population as early as 60 minutes after stimulation, suggesting significant  
106 heterogeneity within this compartment.

107 Finally, to visualize protein and transcriptome data in an intuitive single plot, we  
108 adapted One-SENSE, which was originally developed for visualization of mass  
109 cytometry data (Cheng et al., 2016). This adaptation allows for effective visualization  
110 and identification of cellular phenotypes that differ either by transcript or by protein.

111 Overall, we provide a methodological toolset for generating high throughput multi-omic  
112 single cell data with a focus on maximizing target transcript sensitivity at minimal read  
113 depth and an analytical tool to visualize these protein and transcript datasets.

114

115

## 116 **Results**

### 117 *Comparison of oligonucleotide-labelled antibody probes to high-dimensional flow* 118 *cytometry*

119 For our reference data set we obtained peripheral blood mononuclear cells (PBMCs)  
120 from three healthy control subjects carrying the HLA-A\*02:01 allele, which allowed  
121 isolation of EBV-specific CD8<sup>+</sup> T cells using an EBV-Tetramer reagent (Dunne et al.,  
122 2002). To ensure sufficient cell numbers of these rare, antigen-specific T cells, we  
123 enriched tetramer-positive T cells by fluorescence-activated cell sorting (FACS). In  
124 parallel, we sorted CD45<sup>+</sup> live leukocytes from PBMCs (Figure 1A). Moreover, to  
125 minimize batch effects during subsequent staining with 41 oligo-nucleotide labelled  
126 antibodies (Figure 1B), we utilized a multiplexing protocol using barcoded cell-hashing  
127 antibodies (Stoeckius et al., 2018). All samples were processed simultaneously using  
128 the Rhapsody platform, a nano-well based cartridge system (Fan et al., 2015) for  
129 single-cell RNA sequencing with a targeted approach focusing on 490 immune-  
130 relevant transcripts (all targets are listed in Suppl Table 1). Following quality control  
131 and removal of multiplets, we recovered 27,258 cells from the sequencing data, which  
132 were evenly distributed across the three different donors.

133 First, we wanted to assess whether the surface protein phenotypes as defined by  
134 sequencing match known biology. For this, we designed two optimized 30-parameter  
135 immunophenotyping panels (adapted from (Mair and Prlic, 2018)) covering the same 41  
136 protein targets in an overlapping fashion. We used these panels to stain whole  
137 unsorted PBMC samples from the same 3 donors, down-sampled the cytometry data  
138 to 27,000 cells and used biaxial gating to identify the main immune lineages of the



139 myeloid compartment (Figure 1C) as well as the lymphoid compartment (Figure 1D). All  
140 populations were present at comparable frequencies in the two different data sets  
141 (Figure 1E and Figure 1F), with myeloid cells showing slightly lower abundance due to  
142 the sorting procedure required to enrich EBV-Tetramer<sup>+</sup> cells as well as CD45<sup>+</sup> live  
143 cells. Of note, even low-abundance cell populations such as CD1c<sup>+</sup> conventional  
144 dendritic cells (cDCs) and crosspresenting CD141<sup>+</sup> cDCs were clearly identified by their  
145 surface protein phenotype. Furthermore, the oligonucleotide-labelled antibodies  
146 allowed to discriminate the CD45 splice variants CD45RO and CD45RA, which cannot  
147 be distinguished by 3' transcriptomic analysis alone.  
148 However, for the anti-TCR $\gamma\delta$  reagent we used, discordant patterns were observed  
149 when comparing the expression within CD3<sup>+</sup> T cells to conventional flow cytometry  
150 (Supplementary Figure 1A). This was not immediately evident when visualizing the data  
151 on a heatmap (Supplementary Figure 1B), emphasizing the need for careful reagent  
152 validation for sequencing-based protein measurements. Thus, we did not analyze  $\gamma\delta$  T  
153 cells separately for the rest of our study. Furthermore, the CCR7 reagent delivered sub-  
154 optimal but usable resolution (data not shown).

155  
156 *Targeted transcriptomics faithfully captures cellular heterogeneity similar to whole*  
157 *transcriptome approaches at lower read depths*

158 Next, we wanted to assess how well a targeted transcriptomics approach can identify  
159 immune cell heterogeneity compared to a commonly used whole transcriptome (WTA)  
160 pipeline. For this, we used a single donor and compared the resulting populations after  
161 graph-based-clustering of the transcript data using the R package Seurat

162 implementation of PhenoGraph at standard resolution settings (Butler et al., 2018;  
163 Levine et al., 2015) (Figure 2A and Suppl. Figure 2A and 2B). For visualization, we used  
164 uniform manifold approximation and projection (UMAP), a dimensionality reduction  
165 approach that has recently been adopted for single-cell data (Becht et al., 2018;  
166 McInnes et al., 2018). Overall, the targeted transcriptomic approach utilizing 490 genes  
167 revealed similar or even improved resolution of known immune subsets in the  
168 peripheral blood. In particular, CD4<sup>+</sup> T cells and CD8<sup>+</sup> T cells separated well, and we  
169 observed regulatory T cells (Tregs) expressing FOXP3 and CTLA4 as a separate cluster  
170 (Figure 2B). For verification of this Treg cluster, we utilized the corresponding protein  
171 signature, which showed high expression of CD25, and low expression of CD127  
172 (Figure 2C). Next, we compared the gene expression for four phenotypically similar  
173 clusters in the WTA and the targeted transcriptomics data set, showing very similar  
174 patterns for the top differentially expressed genes (Suppl. Figure 2B). To obtain a  
175 relative measure of detection efficiency, we calculated the average number of  
176 transcripts per cell both for the targeted transcriptomics as well as the WTA data set  
177 from the same donor. Around 75% of the assayed genes showed equal or slightly  
178 superior detection efficiencies (Figure 2D), suggesting that targeted transcriptomics  
179 can deliver valuable information at relatively low sequencing cost (i.e. approximately  
180 2500 reads/cell).

181 Finally, to directly assess the effect of different read-depths on resolution of protein  
182 and transcript signals, we analyzed a different donor to a total of approximately 27,000  
183 reads/cell (approximately 18,000 reads/cell for the antibody library, 9,000 reads/cell for  
184 the transcript library) and subsampled the number of reads used during processing of

185 the raw data to 20% (approximately 4000 reads/cell for antibody library, 2000  
186 reads/cell for transcript library) and 10%. Visualization of the resulting clusters on a  
187 UMAP plot as well as the top-differentially expressed genes on a heatmap revealed no  
188 major differences between using 100% or 20% of the reads (Supplementary Figure  
189 2C). For the protein signal, the same was observed, while using only 10% of the reads  
190 resulted in noticeable loss of signal intensities (Supplementary Figure 2D). Overall, we  
191 conclude that using at least 2000 reads/cell for the transcript portion of the library and  
192 at least 200 reads/antibody/cell for the antibody portion of the antibody library delivers  
193 sufficient resolution.

194

195 *Multi-omic analysis identifies canonical memory T cell populations and allows the study*  
196 *of rare-antigen specific CD8<sup>+</sup> T cells*

197 To test the value of multi-omic single cell analysis on a specific subset of the immune  
198 compartment, we performed an in-depth analysis of the CD8<sup>+</sup> T cell compartment.  
199 First, we visualized protein and RNA data collected from total CD45<sup>+</sup> live cells from  
200 PBMCs from three patents on separate UMAP plots (Fig 1A). We found that cells from  
201 different donors comingled and separated by cell type rather than by donor,  
202 suggesting that batch effect across donors was minimal (Figure 3A). Of note, protein  
203 information overlayed on the transcript-generated UMAP plot allowed accurate  
204 identification of all main immune clusters (Figure 3B), which is not necessarily the case  
205 when using transcript information for the corresponding lineage markers. This is  
206 exemplified by biaxial plots showing protein signal on the y-axis and transcript signal  
207 on the x-axis (Figure 3C): While for CD8A, transcript and protein are co-expressed in

208 most cells, only half of the CD4-protein<sup>+</sup> (throughout the manuscript abbreviated as  
209 CD4-P) cells contained detectable CD4-transcript. In turn, there were other molecules  
210 of interest where the inverse was observed: CD69-RNA (plotted on the x-axis) was  
211 detected across a large number of T cells, but as expected only few T cells in the  
212 peripheral blood express CD69 protein (CD69-P, plotted on y-axis) on their surface.  
213 For CD27, we observed a higher correlation between transcript and protein (Figure 3C).  
214 Overall, these observations emphasize the importance of parallel measurement of  
215 protein and transcript to faithfully study T cell biology.

216 Next, we continued our analysis of CD3<sup>+</sup>CD4<sup>-</sup>CD8<sup>+</sup> T cells as defined by surface protein  
217 expression using SCAMP (Selected Clustering Annotated using Modes of Projections)  
218 (Greene et al., 2018). Unbiased graph-based clustering using transcript information  
219 suggested the presence of 5 distinct cellular clusters (Figure 3D). Visualization of the  
220 top differentially expressed genes such as SELL (encoding CD62L), CCR7 and GZMB  
221 suggested that these 5 clusters reflect canonical naïve and memory T cell populations  
222 (Sallusto et al., 1999) (Figure 3E). Additionally, our data allowed identification of CD8<sup>+</sup>  
223 mucosal associated invariant T (MAIT) cells, which express high levels of IL18RAP and  
224 TNF (Slichter et al., 2016) (Mori et al., 2016). We confirmed the resemblance of these  
225 populations by surface protein expression (Figure 3F), with central memory CD8<sup>+</sup> T  
226 cells expressing low levels of CD45RA-protein, and high CD27- and CD28-protein  
227 (Sallusto et al., 2004) (Hamann et al., 1997). Of note, the splice variants CD45RO and  
228 CD45RA cannot be distinguished by analyzing transcript alone, highlighting the added  
229 value of combined protein and transcript analysis.

230 To visualize the correspondence between transcript and protein expression in the  
231 multi-omic data set, we adopted One-SENSE, which has originally been developed for  
232 biologically meaningful visualization of mass cytometry data (Cheng et al., 2016). For  
233 this, we mapped cells separately by proteins and transcripts each on to a single UMAP  
234 dimension, similar to a recently published 1D t-stochastic neighbor embedding (t-SNE)  
235 representation for sc-RNA sequencing data (Linderman et al., 2019). The combined  
236 plot shows the overall distribution of protein expression profiles in the x-axis and the  
237 top-differentially expressed gene profiles on the y-axis. Aligned heatmaps that  
238 represent median expression with bins of cells are provided to annotate the one-  
239 dimensional UMAP protein and gene expression profiles. This approach allows easy  
240 identification of cellular clusters that are similar by transcript, but separated by protein,  
241 and vice versa (Figure 3G). One example for this is highlighted in Figure 3G (red box  
242 and arrow), where cluster 2 (light green, containing TEMRA cells) is relatively  
243 homogenous by transcript, but can be separated by CD56 protein expression,  
244 probably marking some NKT cells. In turn, a fraction of cells between cluster 1 (dark  
245 blue, effector memory CD8<sup>+</sup> T cells) and 2 (green, TEMRA) shares the same protein  
246 signature, but can be distinguished by GNLY and GZMH expression (Fig. 3G, red box  
247 and arrows). Varying degrees of concordance and ability to discriminate cellular  
248 subsets from gene and protein expression profiles can be seen across this plot.

249 To determine if targeted transcriptomics is amenable for studying rare antigen-specific  
250 T cell populations, we analyzed CD8<sup>+</sup> T cells recognizing an EBV-epitope (Dunne et al.,  
251 2002). Visualization on the UMAP plot revealed remarkable similarity of EBV-specific T  
252 cells across all three donors (Figure 3H). As expected, most of the cells grouped within

253 the effector memory CD8<sup>+</sup> T cell cluster. However, relative to the EBV-nonspecific  
254 memory T cell cluster the EBV-Tet<sup>+</sup> T cells showed a significant downregulation of the  
255 effector molecule Granulysin, and an upregulation of YBX3, an RNA binding protein  
256 whose function has not been defined in T cells, but has recently been shown to be a  
257 critical regulator for the stability of specific mRNAs (Cooke et al., 2019).  
258 Overall, this data show that combining targeted transcriptomics and protein  
259 phenotyping by sequencing is a valuable approach for studying T cell subsets and  
260 could be used a resource-efficient tool for studying T cell responses in human disease.

261

262 *Short-term stimulation of T and NK cells reveals chemokine heterogeneity and a*  
263 *disconnect with the early activation marker CD69*

264 Cytokines and chemokines are the quintessential effector molecules of T cells, and the  
265 existence of specific T cell subsets that are poised for the production of certain  
266 cytokines has been the subject of intense research over the past decade (van den  
267 Broek et al., 2018; Zhou et al., 2009). To test whether multi-omic single-cell analysis  
268 can provide additional insight, we purified pan T cells together with NK cells and  
269 stimulated them for one hour with Phorbol-Myristate-Acetate (PMA) and Ionomycin.  
270 We probed early transcriptional changes with a T cell centric targeted transcriptomic  
271 approach covering 259 genes. Transcripts encoding for IFNG, FASL and ICOS  
272 exhibited robust upregulation in the stimulated versus unstimulated sample (Figure 4A),  
273 as was the case for CD69, a commonly utilized protein marker for early T cell activation  
274 (Figure 4B). Of note, when we analyzed cytokine expression relative to the surface  
275 protein expression of CD69, we observed that both IFN $\gamma$  as well as TNF transcript was

276 primarily expressed in CD69-transcript positive, but CD69-protein negative cells,  
277 suggesting that during very early stages of activation, CD69 protein might not be an  
278 ideal marker for T cell activation. However, FOSB, part of the transcription factor AP-1,  
279 was co-expressed with CD69-protein (Figure 4B), suggesting a close relationship of  
280 FOSB and CD69 expression.

281 We focused our further analysis on CD8<sup>+</sup> T cells only, though our data set also contains  
282 information on NK cells. Projection on a UMAP plot showed 8 discernable clusters that  
283 were selected manually. Protein expression patterns for CD45RA and CD45RO  
284 highlight the naïve and the memory T cells within this plot (Figure 4C). A heatmap  
285 visualization of the most highly expressed transcripts show that these clusters are  
286 defined by differential expression of CCL3, CCL4, IFNG, TNF, and various granzymes  
287 (Figure 4D). Overall, this analysis reveals considerable functional diversity within the  
288 CD8<sup>+</sup> T cell compartment that is detectable as early as one hour after stimulation.

289

290 *Multi-omic analysis of the peripheral myeloid compartment reveals inflammatory*  
291 *subsets not captured by surface protein phenotype*

292 Next, we wanted to assess whether the targeted transcriptomics approach can also be  
293 used for other immune populations that are not as well studied as T cells. During the  
294 past decade it has become evident that the myeloid cell compartment is complex in  
295 terms of cellular heterogeneity (Guilliams et al., 2014; See et al., 2017; Villani et al.,  
296 2017), and that commonly used bone-marrow derived differentiation protocols do not  
297 faithfully capture the phenotype of myeloid cells *in vivo* (Guilliams and Malissen, 2016;  
298 Helft et al., 2015). Thus, we tested how well targeted transcriptomics could dissect the

299 heterogeneity of the peripheral myeloid compartment. Unbiased clustering using  
300 transcript suggested the presence of 5 different populations (Figure 5A), with clear  
301 separation for CD14 and CD16 protein expression (Figure 5B). As expected,  
302 visualization of the top differentially expressed genes (Figure 5C) as well as key surface  
303 proteins (Figure 5D) mapped these clusters to CD123<sup>+</sup> plasmacytoid dendritic cells  
304 (pDCs), CD1c<sup>+</sup> conventional DCs (cDC2s), CD16<sup>+</sup> monocytes and CD14<sup>+</sup> monocytes.  
305 We used One-SENSE to further explore the relationship between cluster 0 and 1,  
306 revealing that these two populations were very similar in terms of surface protein  
307 profile (CD14<sup>+</sup>CD16<sup>-</sup>), but separated by a specific set of transcripts encoding for pro-  
308 inflammatory cytokines and chemokines (Figure 5E). We confirmed that these  
309 transcripts were part of differentially expressed genes as identified by MAST (Finak et  
310 al., 2015), with higher expression in cluster 1 of CXCL3 and CCL4 (also known as MIP-  
311 1b, a chemoattractant for natural killer cells) (Figure 5E). Thus, combining protein and  
312 transcriptome data allowed us to observe multiple functional subsets within the  
313 peripheral CD14<sup>+</sup> myeloid population which were not apparent by surface marker  
314 expression alone. In summary, this data highlights that targeted transcriptomics can be  
315 used for exploratory studies of different immune compartments.

316

317



## 318 **Discussion**

319 Current efforts in the field of single cell analysis focus on the integrative measurement  
320 of multiple modalities per cell. Ultimately, being able to analyze genome accessibility  
321 status, transcript, regulatory RNAs and protein expression all together would allow a  
322 holistic understanding of cellular function, but this has not been achieved yet (Stuart  
323 and Satija, 2019). Arguably one of the most important steps on this trajectory has been  
324 the ability to combine protein and transcript measurements by sequencing at the single  
325 cell level using high-throughput methods (Peterson et al., 2017; Stoeckius et al., 2017).  
326 However, with increased cell numbers, these combined measurements can quickly  
327 become resource intensive, mostly due to the high number of sequencing reads that  
328 are required per cell. Moreover, to fully leverage the advantage of multi-omic single-cell  
329 analysis approaches, it is imperative to collect large cell numbers to adequately  
330 represent low-abundance cellular populations such as antigen-specific T cells, or  
331 antigen-presenting cells.

332 The targeted transcriptomic approach that we describe here provides an alternative  
333 platform that significantly lowers the number of reads required for sequencing  
334 saturation of transcript compared to whole transcriptome (WTA) approaches, but still  
335 provides valuable information on up to 499 immune-centric genes. Though this  
336 approach sacrifices the unbiased nature of WTA measurements, many immunological  
337 applications center on a set of critical immune effector molecules, such as cytokines,  
338 chemokines or transcription factors. Also, a targeted approach avoids the significant  
339 number of reads used by transcripts encoding ribosomal proteins which are often also  
340 captured using a poly-A based whole transcriptome workflow. Furthermore, as shown

341 here, in some cases, targeted analysis can permit higher sensitivity when it comes to  
342 detecting relatively low abundance genes. Overall, in many experimental setups it  
343 might be beneficial to combine both approaches: first utilize a WTA platform to identify  
344 potentially unknown transcripts, and then use a targeted approach (which can be  
345 tailored towards gene sets of interest) for profiling larger cell numbers or interrogating  
346 cellular responses to specific stimuli. We provide proof-of-concept data that as early  
347 as one hour after stimulation CD8<sup>+</sup> T cells show heterogeneous patterns of chemokine  
348 expression. Comprehensive chemokine and cytokine profiling of T cells after a very  
349 short stimulus could be very valuable to gain additional insights into their function e.g.  
350 in the context of cancer immunotherapy (Nagarsheth et al., 2017).

351 The decreased number of reads per cell required for targeted transcriptomics makes  
352 the approach very suitable for combined profiling of transcript and protein for larger  
353 number of cells. Doing so is particularly relevant in the context of T cell biology, where  
354 well established T cell subsets, such as memory T cells and regulatory T cells (Tregs)  
355 up to date have been difficult to resolve in some droplet-based sc-RNAseq studies  
356 solely on the basis of transcript (Zheng et al., 2017). This has been attributed to the fact  
357 that lymphocytes contain a relatively low amount of mRNA, which in combination with  
358 the inherent drop-out rate of sc-RNAseq protocols fails to detect some low abundance  
359 transcripts that are defining these cellular subsets (Stuart and Satija, 2019). This issue  
360 can be alleviated by measuring surface protein markers such as the splice variants  
361 CD45RA and CD45RO, which have been well studied in the context of naïve and  
362 memory T cells, or the IL-2 receptor alpha chain (CD25) and IL-7 receptor (CD127) for  
363 the distinction of Tregs. In addition, parallel measurement of surface protein

364 phenotypes allows to link novel cellular clusters (that are defined solely by transcript)  
365 with a large body of literature that used to define cells by surface protein phenotype  
366 only. Finally, the combined measurement approach can be useful to identify targets  
367 with a significant disconnect between transcript and protein expression such as CD69,  
368 probably indicative of active post-transcriptional modifications.

369 Of note, the development of novel technologies can sometimes outpace our ability to  
370 validate platforms and reagents. Given that typical single cell sequencing experiments  
371 require complex pre-processing steps and are often visualized using dimensionality  
372 reduction techniques such as UMAP or t-SNE, there is a disconnect between the  
373 actual raw data and the interpretation of final heatmaps. While this might be less of a  
374 problem for transcript counts, antibody-based probes require careful validation. Here,  
375 we have used high-dimensional cytometry, highlighting that not all reagents, even if the  
376 same antibody clone is used, perform equally well in a multi-omic sequencing  
377 experiment relative to conventional cytometry. Thus, with the more widespread  
378 adoption of sequencing-based protein measurements, we argue that reagents need to  
379 be carefully tested, preferably with parallel deposition in public databases.

380 Ultimately, to advance our understanding of biology the field relies on innovative  
381 approaches to analyze and visualize complex high-dimensional data (Butler et al.,  
382 2018; Cao et al., 2019; Stuart and Satija, 2019). Due to the different expression scales  
383 this presents a challenge for combined protein-transcript data sets. To alleviate this  
384 problem, we have adopted an analysis approach successfully used for high-  
385 dimensional cytometry data, one-dimensional soli expression by nonlinear stochastic  
386 embedding (One-SENSE) (Cheng et al., 2016). By visualizing the top-differentially

387 expressed genes in one dimension relative to the measured protein phenotypes this  
388 method allows to easily dissect cells that are similar in transcript, but different in  
389 surface phenotype, and vice versa. This will be a useful tool for biologists to explore  
390 future multi-omic data sets to extract biological meaning from these complex multi-  
391 dimensional data.

392

393

394 **Acknowledgements**

395 We would like to thank the HIV Vaccine Trial Network (HVTN) for providing samples  
396 and for access to their flow cytometry instrumentation (in particular Dr. Stephen de  
397 Rosa), the Flow Cytometry Shared Resources Core of the FHCRC (in particular Andrew  
398 Berger), and the Genomics Shared Resources Core of the FHCRC for sequencing. We  
399 thank members of the Newell and Prlic labs for critical discussion. This work was  
400 supported by NIH grants R01AI123323 (to M.P.) and 5U19AI128914 (to R.G.). E.W.N.,  
401 Y.S., and T.B. were supported by Fred Hutchinson Cancer Research Center New  
402 Development funding and by the Andy Hill Research Endowment.

403

404 **Author contributions**

405 F.M. and J.R.E. designed and performed experiments, analyzed data and wrote the  
406 manuscript. V.V. analyzed data and provided critical input. Y.S. performed  
407 experiments. T.B. analyzed data. A.J.T. and J.M. provided critical input. E.W.N., R.G.  
408 and M.P. designed the study, analyzed data and co-wrote the manuscript.

409

410 **Conflict of interest**

411 A.J.T. and J.M. are employees of BD Biosciences (manuscript approval by BD  
412 Biosciences was not required and BD Biosciences had no influence in regard to data  
413 analysis, data interpretation and discussion). R.G. has received support from Juno  
414 Therapeutics and Janssen Pharma, has consulted for Takeda Vaccines, Juno  
415 Therapeutics and Infotech Soft, and has ownership interest in CellSpace Bio.

416

417

418

419 **Figure Legends**

420

421 **Figure 1: Comparison of oligo-nucleotide antibody probes to high-dimensional**  
422 **flow cytometry.**

423 (A) Schematic graph describing the workflow of the experiment. PBMC samples from  
424 three donors were split in half, with one aliquot used for the multi-omic workflow, and  
425 one aliquot used for flow cytometry phenotyping using two 30-parameter panels. (B)  
426 Overview of antibody targets used in both the multi-omic and conventional flow  
427 cytometry experiment. (C) Manual gating of main immune subsets using the combined  
428 AbSeq data set (upper panel, red) and concatenated and down-sampled events  
429 (27,000 cells) from the conventional (conv) flow cytometry data set (lower panel, blue).  
430 (D) Manual gating of various T cell markers using the combined AbSeq data set (upper  
431 panel, red) and concatenated, down-sampled events from the cytometry data set  
432 (lower panel, blue). (E) Quantification of main immune subsets in the AbSeq and flow  
433 cytometry data set across the three different donors. (F) Quantification of main T cell  
434 populations and selected phenotyping markers in the AbSeq and flow cytometry data  
435 set across the three different donors.

436

437 **Figure 2: Targeted transcriptomics faithfully captures cellular heterogeneity in**  
438 **peripheral blood mononuclear cells.**

439 (A) Graph-based clustering of the transcript data from one representative donor is  
440 shown on a UMAP (uniform manifold approximation projection) plot. Clusters have

441 been annotated by expression of key lineage genes. (B) The top 10-differentially  
442 expressed genes for each cluster were identified using the Seurat implementation of  
443 MAST (model-based analysis of single-cell transcriptomes) and visualized on a  
444 heatmap after z-score normalization. Cluster names are shown in the same color  
445 scheme as in (A). (C) Expression of the indicated transcripts and proteins on the three  
446 different CD4<sup>+</sup> T cell clusters, highlighting the CD25<sup>+</sup> CD127<sup>low</sup> Treg cluster. (D) Relative  
447 detection ratio of all detected transcripts relative to a whole transcriptome data set  
448 from the same donor. Genes are manually assigned into four different groups  
449 according to their relative detection ratio.

450

451 **Figure 3: Multi-omic targeted transcriptomics identifies canonical memory T cell**  
452 **populations and allows the study of rare-antigen specific CD8<sup>+</sup> T cells**

453 (A) UMAP plots calculated on protein (left) or transcript (right) show that there is no  
454 batch effect across the three donors analyzed. (B) Example UMAP plots (calculated on  
455 transcript) representing the expression of the main immune lineage protein markers  
456 which allow the unequivocal identification of CD4<sup>+</sup> and CD8<sup>+</sup> T cells, CD19<sup>+</sup> B cells, and  
457 CD14<sup>+</sup> as well as CD16<sup>+</sup> myeloid cells. (C) Example plots showing the poor correlation  
458 of transcript and protein levels for CD4 and CD69, and good correlation for CD8 and  
459 CD27. Protein signal is plotted on the y-axis, transcript on the x-axis. (D) UMAP plot  
460 and graph-based clustering of the CD3<sup>+</sup> CD8<sup>+</sup>CD4<sup>-</sup> T cell compartment, revealing 5  
461 distinct populations. (E) Examples of top differentially expressed genes identified by  
462 MAST for each of the 5 clusters highlighted in (D). (F) Protein signatures of the 5  
463 clusters identified canonical naive and memory CD8<sup>+</sup> T cell subsets, including mucosal



464 associated invariant T cells (MAIT cells). (G) One-SENSE plot depicting protein  
465 expression heatmap along the x-axis, and transcript expression heatmap of the top  
466 differentially expressed genes along the y-axis. (H) Identification of EBV-specific CD8<sup>+</sup>  
467 T cells relative to all CD8<sup>+</sup> T cells, and expression pattern of two differentially  
468 expressed genes between Tetramer-positive cells and Tetramer negative cells in the  
469 effector memory cluster 1.

470

471 **Figure 4: Multi-omic analysis of the T and NK cell compartment 1 hour after**  
472 **stimulation**

473 (A) Representative plots showing the upregulation of selected effector transcripts such  
474 as IFNG, FASL and ICOS after stimulation (red) relative to unstimulated cells (blue). (B)  
475 Disconnect between surface protein expression of the early activation marker CD69  
476 and IFNG and TNF transcript within CD8-protein<sup>+</sup> T cells. Blue overlay indicated  
477 unstimulated cells, red stimulated cells. (C) UMAP plot of CD8-protein<sup>+</sup> T cells with  
478 manually identified clusters, and CD45RA and CD45RO protein expression. (D)  
479 Heatmap showing the expression of key effector transcripts within the clusters  
480 identified in (C).

481

482 **Figure 5: Combined protein and transcript phenotyping of the peripheral myeloid**  
483 **compartment reveals inflammatory subsets not captured by surface protein**  
484 **phenotype**

485 (A) UMAP plot and graph-based clustering of the peripheral non T/non NK/non B cell  
486 compartment, revealing 5 distinct populations. (B) Heatmap overlay of CD14<sup>-</sup> and

487 CD16-protein expression. (C) Heatmap of the top differentially expressed genes  
488 identified by MAST for each of the 5 clusters highlighted in (A). (D) Protein signatures of  
489 the 5 clusters identifies canonical CD123<sup>+</sup> plasmacytoid DCs, CD1c<sup>+</sup> conventional DCs  
490 and CD16<sup>+</sup> monocytes, but two of the clusters mapping to CD14<sup>+</sup> monocytes. (E) One-  
491 SENSE plot depicting protein expression heatmap along the x-axis, and transcript  
492 expression heatmap of some of the top differentially expressed genes along the y-axis.  
493 Red box and arrows are highlighting the differentially expressed genes between  
494 cluster 0 and 1. (F) Violin plots showing key genes of the respective myeloid population  
495 (upper panel) and differentially expressed genes between cluster 0 and 1, suggesting  
496 the presence of an inflammatory subpopulation within CD14<sup>+</sup> CD16<sup>-</sup> monocytes that  
497 expresses high levels of IL1B, TNF, CXCL3 and CCL4.

498

#### 499 **Supplementary figure 1: Example for a poorly performing reagent**

500 (A) Manual gating of main immune subsets using the combined AbSeq data set (upper  
501 panel, red) and concatenated and down-sampled events from the flow cytometry data  
502 set (lower panel, blue), highlighting the population of  $\gamma\delta$  T cells. (B) Heatmap overlay of  
503 the TCRgd signal on a CD4 vs CD8 plot for the AbSeq data set (upper panel) and flow  
504 cytometry data set (lower panel).

505

#### 506 **Supplementary figure 2: Comparison of targeted transcriptomics to whole** 507 **transcriptome data (WTA) and assessment of required sequencing depth**

508 (A) Graph-based clustering of WTA data obtained from the same donor as in main  
509 Figure 2. (B) Four of the clusters that matched most closely in terms of their expression

510 pattern were selected from both experiments and plotted using the top differentially  
511 expressed genes obtained from the targeted transcriptomics approach. Heatmap  
512 represents relative expression after z-score normalization. Left plot shows WTA data,  
513 right plot shows targeted transcriptomic (cells obtained from the same donor). (C)  
514 5,400 cells from a different donor were sequenced at a total depth of approximately  
515 30,000 reads/cell. Upper panel depicts UMAP plot after graph-based clustering and a  
516 heatmap of the top differentially expressed genes (z-score normalized expression) at  
517 full read depth, lower panel using only 20% of the reads. Read depth per cell for the  
518 transcript library is indicated on the right). Squared box on the UMAP plot indicates  
519 one cluster that is separated as cluster 11 at full read depth, but pooled with cluster 8  
520 at lower read-depth (D) Protein signals at the indicated read depths.

521

522 **STAR methods**

523

524 **Cells**

525 Peripheral blood mononuclear cells (PBMCs) were obtained as cryopreserved samples  
526 from healthy controls (Seattle Area Control Cohort) via the HIV Vaccine Trial network  
527 (HVTN). Vials with cryopreserved cells were thawed at 37°C until a tiny ice crystal was  
528 left in the tube, and then carefully diluted in 1mL of pre-warmed RPMI with 10% FBS  
529 and transferred to a new tube. An additional 13 mL of pre-warmed RPMI with 10%  
530 FBS were added drop by drop, followed by centrifugation for 5 minutes at 400g and  
531 resuspension in 1 mL of RPMI.

532

533 **Flow Cytometry and Cell sorting**

534 For flow cytometric analysis good practices were followed as outlined in the guidelines  
535 for use of flow cytometry (Cossarizza et al., 2017). Following thawing, PBMCs were  
536 incubated with Fc-blocking reagent (BioLegend Trustain FcX, #422302) and fixable UV  
537 Blue Live/Dead reagent (ThermoFisher, #L34961) in PBS for 15 minutes at room  
538 temperature. If required, cells were stained with an EBV-Tetramer reagent (peptide  
539 YVLDHLIVV; Fred Hutch Immune Monitoring Core) diluted in FACS buffer (PBS with  
540 2% FBS, Nucleus Biologics) for 30 minutes at room temperature, followed by two  
541 washes. After this, cells were incubated for 20 minutes at room temperature with  
542 antibody master mix freshly prepared in Brilliant staining buffer (BD Bioscience, #  
543 563794), followed by two washes. All antibodies were titrated and used at optimal

544 dilution, and staining procedures were performed in 96-well round-bottom plates.  
545 Stained cells were fixed with 4% PFA for 20 minutes at room temperature, washed,  
546 resuspended in FACS buffer and stored at 4°C in the dark until acquisition.  
547 All samples were acquired using a FACSymphony A5 (BD Biosciences), equipped with  
548 30 detectors and 355nm, 405nm, 488nm, 532nm and 628nm lasers and FACSDiva (BD  
549 Biosciences). Detector gains were optimized using a modified voltage titration  
550 approach (Perfetto et al., 2012) and standardized from day to day using 6-peak Ultra  
551 Rainbow Beads (Spherotec, # URCP-38-2K). Single-stained controls were prepared  
552 with every experiment using antibody capture beads diluted in FACS buffer (BD  
553 Biosciences anti-mouse, #552843 and anti-rat, #552844). After acquisition, data was  
554 exported in FCS 3.1 format and analyzed using FlowJo (version 10.5.x, BD  
555 Biosciences). Doublets were excluded by FSC-A vs FSC-H gating. For some of the  
556 plots, the number of acquired cells was down-sampled using the appropriate FlowJo  
557 plugin to match the number of cells analyzed by AbSeq.  
558 All cell sorting was performed on a FACS Aria III (BD Biosciences), equipped with 20  
559 detectors and 405nm, 488nm, 532nm and 628nm lasers. For all sorts, an 85 µm nozzle  
560 operated at 45 psi sheath pressure was used. Cells were sorted into chilled Eppendorf  
561 tubes containing 500 µL of RPMI, washed once in PBS and immediately used for  
562 subsequent processing.

563

## 564 **Targeted Transcriptome and protein single-cell library preparation and**

## 565 **Sequencing**

566 CD45<sup>+</sup> live PBMCs and EBV-tetramer<sup>+</sup> CD8<sup>+</sup> T cells were sequentially labeled using  
567 Single Cell Labelling with the BD Single-Cell Multiplexing Kit and BD AbSeq Ab-Oligos  
568 reagents strictly following the manufacturers protocol (BD Biosciences). Briefly, cells  
569 from each donor or subtype of cells (after sorting) were labelled with sample tags  
570 (Stoeckius et al., 2018). Each sample was washed twice with FACS buffer before  
571 pooling all samples together. Pooled samples were washed one more time and then  
572 stained with AbSeq Ab-Oligos (BD Biosciences). The pooled sample was then washed  
573 twice, counted and resuspended in cold BD Sample Buffer (BD Biosciences) to achieve  
574 approximately 20,000 cells in 620  $\mu$ l. Single cells from the pooled sample were isolated  
575 using Single Cell Capture and cDNA Synthesis with the BD Rhapsody Express Single-  
576 Cell Analysis System following the manufacturers protocol (BD Biosciences). After  
577 priming the nanowell cartridges, the pooled sample was loaded onto two BD  
578 Rhapsody cartridges and incubated at room temperature. Cell Capture Beads (BD  
579 Biosciences) were prepared and then loaded onto the cartridge and incubated prior to  
580 shaking at 1,000rpm at room temperature for 15 seconds on a ThermoMixer C  
581 (Eppendorf). According to the manufacturers protocol, cartridges were washed, cells  
582 were lysed, and Cell Capture Beads were retrieved and washed prior to performing  
583 reverse transcription and treatment with Exonuclease I. cDNA Libraries were prepared  
584 using mRNA Targeted, Sample Tag, and BD AbSeq Library Preparation with the BD  
585 Rhapsody Targeted mRNA and AbSeq Amplification and BD Single-Cell Multiplexing  
586 Kits and protocol (BD Biosciences). In brief, cDNA underwent targeted amplification  
587 using the Human Immune Response Panel primers and a custom supplemental panel  
588 (all targets are listed in Supplementary Table 1) via PCR (10 cycles). PCR products

589 were purified, and mRNA PCR products were separated from sample tag and AbSeq  
590 products with double-sided size selection using SPRIselect magnetic beads (Beckman  
591 Coulter). mRNA and Sample Tag products were further amplified using PCR (10  
592 cycles). PCR products were then purified using SPRIselect magnetic beads. Quality  
593 and quantity of PCR products were determined by using an Agilent 2200 TapeStation  
594 with High Sensitivity D5000 ScreenTape (Agilent) in the Fred Hutch Genomics Shared  
595 Resource laboratory. Targeted mRNA product was diluted to 2.5 ng/ $\mu$ L and sample tag  
596 and AbSeq PCR products were diluted to 1 ng/ $\mu$ L to prepare final libraries. Final  
597 libraries were indexed using PCR (6 cycles). Index PCR products were purified using  
598 SPRIselect magnetic beads. Quality of final libraries was assessed by using Agilent  
599 2200 TapeStation with High Sensitivity D5000 ScreenTape and quantified using a Qubit  
600 Fluorometer using the Qubit dsDNA HS Kit (ThermoFisher). Final libraries were diluted  
601 to 2nM and multiplexed for paired-end (150bp) sequencing on a HiSeq 2500 sequencer  
602 (Illumina).

603

#### 604 **Whole Transcriptome single-cell library preparation and sequencing**

605 cDNA libraries of CD45<sup>+</sup> Live PBMCs were generated using the Chromium Single Cell  
606 3' Reagent Kits v2 (10x Genomics) protocol targeting 5,000 cells in two separate wells.  
607 Briefly, single cells were isolated into oil emulsion droplets with barcoded gel beads and  
608 reverse transcriptase mix. cDNA was generated within these droplets, then the droplets  
609 were dissociated. cDNA was purified using DynaBeads MyOne Silane magnetic beads  
610 (ThermoFisher). cDNA amplification was performed by PCR (10 cycles) using reagents

611 within the Chromium Single Cell 3' Reagent Kit v2 (10x Genomics). Amplified cDNA  
612 was purified using SPRIselect magnetic beads (Beckman Coulter). cDNA was  
613 enzymatically fragmented and size selected prior to library construction. Libraries were  
614 constructed by performing end repair, A-tailing, adaptor ligation, and PCR (12 cycles).  
615 Quality of the libraries was assessed by using Agilent 2200 TapeStation with High  
616 Sensitivity D5000 ScreenTape (Agilent). Quantity of libraries was assessed by  
617 performing digital droplet PCR (ddPCR) with Library Quantification Kit for Illumina  
618 TruSeq (BioRad). Libraries were diluted to 2nM and paired-end sequencing was  
619 performed on a HiSeq 2500 sequencer (Illumina).

620

#### 621 **Cell Ranger processing for WTA data**

622 Raw base call (BCL) files were demultiplexed to generate Fastq files using the  
623 cellranger mkfastq pipeline within Cell Ranger 2.1.1 (10x Genomics). Targeted  
624 transcriptome Fastqs were further analyzed via Seven Bridges (BD Biosciences). Whole  
625 transcriptome Fastq files were processed using the standard cellranger pipeline (10x  
626 genomics) within Cell Ranger 2.1.1. Briefly, cellranger count performs alignment,  
627 filtering, barcode counting, and UMI counting. The cellranger count output was fed into  
628 the cellranger aggr pipeline to normalize sequencing depth between samples. The final  
629 output of cellranger (molecule per cell matrix) was then analyzed in R using the  
630 package Seurat (version 2.3 and 3.0) as described below.

631

#### 632 **Seven Bridges processing for targeted transcriptomics data**



633 Targeted transcriptomics Fastq files were processed via the standard Rhapsody  
634 analysis pipeline (BD Biosciences) on Seven Bridges ([www.sevenbridges.com](http://www.sevenbridges.com)). First,  
635 R1 and R2 reads are filtered for high-quality reads, dropping reads that are too short  
636 (less than 64 bases for R2) or have a base quality score of less than 20. Then, R1 reads  
637 are annotated to identify cell label sequences and unique molecular identifiers (UMIs),  
638 and R2 reads are mapped to the respective reference sequences using Bowtie2.  
639 Finally, all valid R1 and R2 reads are combined and annotated to the respective  
640 molecules. For all of our analysis, we utilized recursive substitution error correction  
641 (RSEC) as well as distribution-based error correction (DBEC), which are manufacturer-  
642 developed algorithms correcting for PCR and sequencing errors. For determining  
643 putative cells (which will contain many more reads than noise cell labels), a filtering  
644 algorithm takes the number of DBEC-corrected reads into account, calculating the  
645 minimum second derivative along the cumulative reads as the cut-off point. Final  
646 expression matrices contain DBEC-adjusted molecule counts in a CSV format. For  
647 further analysis, these molecule count tables were read into the R package Seurat  
648 (version 2.3 and 3.0) using customized scripts and analyzed as described below.

649

#### 650 **Seurat workflow for targeted and WTA data**

651 The R package Seurat (Butler et al., 2018) was utilized for all downstream analysis. For  
652 whole transcriptome data, cells that had at least 200 genes (with  $\leq 20\%$  being  
653 mitochondrial genes) were included in analysis. A natural log normalization using a  
654 scale factor of 10,000 was performed across the library for each cell. UMIs and  
655 mitochondrial genes (only for WTA data) were linearly scaled to remove these variables

656 as unwanted sources of variation. Dimensionality reduction using UMAP and clustering  
657 was performed on a subset of variable genes. For targeted transcriptomics, no gene  
658 per cell cutoffs were imposed, data were normalized with the same method. However,  
659 when scaling data, UMI was the only regressed variable. Dimensionality reduction  
660 using UMAP and clustering was based on either all genes or all proteins. For  
661 differential gene expression analysis we utilized the Seurat implementation of MAST  
662 (model-based analysis of single-cell transcriptomes) (Finak et al., 2015). For generation  
663 of some FCS files the antibody molecule count tables were converted using the R  
664 packages *premess* and *flowCore*. FCS-files with antibody molecule count signals  
665 were analyzed in FlowJo 10.5.x (BD Biosciences) using either an arcsin transform or  
666 biexponential transform. All the scripts used, listing the detailed parameters for each  
667 step are available at [https://github.com/MairFlo/Targeted\\_transcriptomics](https://github.com/MairFlo/Targeted_transcriptomics). Raw data  
668 will be deposited on the NCBI gene expression Omnibus at  
669 <https://www.ncbi.nlm.nih.gov/geo/>.

670

#### 671 **Data processing for One-SENSE and generation of FCS files**

672 CSV files of raw counts were converted to FCS files using a script adapted  
673 from <https://gist.github.com/yannabraham/c1f9de9b23fb94105ca5>. Raw counts were  
674 normalized based on total counts per cell, then scaled to a value of 10,000 based on  
675 the Seurat normalization algorithm. A natural log transformation was applied to gene  
676 expression data, while protein expression data was randomized by adding a random  
677 uniform distribution from 0 to 1, followed by transformation with the function  
678  $\text{arcsinh}(x/5)$ . Dimensionality reduction using UMAP was performed separately on all

679 genes and proteins to reduce them to one dimension before plotting. Cells were also  
680 split into 500 bins of equivalent width based on one-dimensional UMAP data, then  
681 used to generate heatmaps colored by median marker intensity per bin. All scripts  
682 used for data processing and plot generation are available at  
683 [https://github.com/MairFlo/Targeted\\_transcriptomics](https://github.com/MairFlo/Targeted_transcriptomics).

684

685

686

687

## 688 References

689

- 690 Azimifar, S.B., Nagaraj, N., Cox, J., and Mann, M. (2014). Cell-type-resolved  
691 quantitative proteomics of murine liver. *Cell Metab* 20, 1076-1087.
- 692 Becht, E., McInnes, L., Healy, J., Dutertre, C.A., Kwok, I.W.H., Ng, L.G., Ginhoux, F.,  
693 and Newell, E.W. (2018). Dimensionality reduction for visualizing single-cell data  
694 using UMAP. *Nat Biotechnol*.
- 695 Butler, A., Hoffman, P., Smibert, P., Papalexi, E., and Satija, R. (2018). Integrating  
696 single-cell transcriptomic data across different conditions, technologies, and  
697 species. *Nature biotechnology* 36, 411-420.
- 698 Cao, J., Spielmann, M., Qiu, X., Huang, X., Ibrahim, D.M., Hill, A.J., Zhang, F., Mundlos,  
699 S., Christiansen, L., Steemers, F.J., *et al.* (2019). The single-cell transcriptional  
700 landscape of mammalian organogenesis. *Nature* 566, 496-502.
- 701 Cheng, Y., Wong, M.T., Van Der Maaten, L., and Newell, E.W. (2016). Categorical  
702 Analysis of Human T Cell Heterogeneity with One-Dimensional Soli-Expression by  
703 Nonlinear Stochastic Embedding. *The Journal of Immunology* 196, 924-932.
- 704 Chiang, M.K., and Melton, D.A. (2003). Single-cell transcript analysis of pancreas  
705 development. *Dev Cell* 4, 383-393.
- 706 Cooke, A., Schwarzl, T., Huppertz, I., Kramer, G., Mantas, P., Alleaume, A.M., Huber,  
707 W., Krijgsveld, J., and Hentze, M.W. (2019). The RNA-Binding Protein YBX3  
708 Controls Amino Acid Levels by Regulating SLC mRNA Abundance. *Cell Rep* 27,  
709 3097-3106 e3095.
- 710 Cossarizza, A., Chang, H.-D., Radbruch, A., Andrä, I., Annunziato, F., Bacher, P.,  
711 Barnaba, V., Battistini, L., Bauer, W.M., Baumgart, S., *et al.* (2017). Guidelines for  
712 the use of flow cytometry and cell sorting in immunological studies. *European*  
713 *journal of immunology* 47, 1584-1797.
- 714 Dunne, P.J., Faint, J.M., Gudgeon, N.H., Fletcher, J.M., Plunkett, F.J., Soares, M.V.,  
715 Hislop, A.D., Annels, N.E., Rickinson, A.B., Salmon, M., *et al.* (2002). Epstein-Barr  
716 virus-specific CD8(+) T cells that re-express CD45RA are apoptosis-resistant  
717 memory cells that retain replicative potential. *Blood* 100, 933-940.
- 718 Fan, H.C., Fu, G.K., and Fodor, S.P. (2015). Expression profiling. Combinatorial labeling  
719 of single cells for gene expression cytometry. *Science* 347, 1258367.
- 720 Finak, G., McDavid, A., Yajima, M., Deng, J., Gersuk, V., Shalek, A.K., Slichter, C.K.,  
721 Miller, H.W., McElrath, M.J., Prlic, M., *et al.* (2015). MAST: a flexible statistical  
722 framework for assessing transcriptional changes and characterizing heterogeneity  
723 in single-cell RNA sequencing data. *Genome biology* 16, 278.
- 724 Greene, E., Finak, G., and Gottardo, R. (2018). Selective Clustering Annotated using  
725 Modes of Projections. *arXiv preprint arXiv:180710328*.
- 726 Williams, M., Ginhoux, F., Jakubzick, C., Naik, S.H., Onai, N., Schraml, B.U., Segura,  
727 E., Tussiwand, R., and Yona, S. (2014). Dendritic cells, monocytes and  
728 macrophages: a unified nomenclature based on ontogeny. *Nat Rev Immunol* 14,  
729 571-578.

- 730 Williams, M., and Malissen, B. (2016). A Matter of Perspective: Moving from a Pre-  
731 omic to a Systems-Biology Vantage of Monocyte-Derived Cell Function and  
732 Nomenclature. *Immunity* 44, 5-6.
- 733 Hamann, D., Baars, P.A., Rep, M.H., Hooibrink, B., Kerkhof-Garde, S.R., Klein, M.R.,  
734 and van Lier, R.A. (1997). Phenotypic and functional separation of memory and  
735 effector human CD8+ T cells. *J Exp Med* 186, 1407-1418.
- 736 Helft, J., Bottcher, J., Chakravarty, P., Zelenay, S., Huotari, J., Schraml, B.U., Goubau,  
737 D., and Reis e Sousa, C. (2015). GM-CSF Mouse Bone Marrow Cultures Comprise  
738 a Heterogeneous Population of CD11c(+)MHCII(+) Macrophages and Dendritic  
739 Cells. *Immunity* 42, 1197-1211.
- 740 Jaitin, D.A., Kenigsberg, E., Keren-Shaul, H., Elefant, N., Paul, F., Zaretsky, I., Mildner,  
741 A., Cohen, N., Jung, S., Tanay, A., *et al.* (2014). Massively parallel single-cell RNA-  
742 seq for marker-free decomposition of tissues into cell types. *Science* 343, 776-779.
- 743 Klein, A.M., Mazutis, L., Akartuna, I., Tallapragada, N., Veres, A., Li, V., Peshkin, L.,  
744 Weitz, D.A., and Kirschner, M.W. (2015). Droplet barcoding for single-cell  
745 transcriptomics applied to embryonic stem cells. *Cell* 161, 1187-1201.
- 746 Levine, J.H., Simonds, E.F., Bendall, S.C., Davis, K.L., Amir el, A.D., Tadmor, M.D.,  
747 Litvin, O., Fienberg, H.G., Jager, A., Zunder, E.R., *et al.* (2015). Data-Driven  
748 Phenotypic Dissection of AML Reveals Progenitor-like Cells that Correlate with  
749 Prognosis. *Cell* 162, 184-197.
- 750 Linderman, G.C., Rachh, M., Hoskins, J.G., Steinerberger, S., and Kluger, Y. (2019).  
751 Fast interpolation-based t-SNE for improved visualization of single-cell RNA-seq  
752 data. *Nat Methods* 16, 243-245.
- 753 Macosko, E.Z., Basu, A., Satija, R., Nemesh, J., Shekhar, K., Goldman, M., Tirosh, I.,  
754 Bialas, A.R., Kamitaki, N., Martersteck, E.M., *et al.* (2015). Highly Parallel Genome-  
755 wide Expression Profiling of Individual Cells Using Nanoliter Droplets. *Cell* 161,  
756 1202-1214.
- 757 Mair, F., and Prlic, M. (2018). OMIP-044: 28-color immunophenotyping of the human  
758 dendritic cell compartment. *Cytometry A* 106, 255.
- 759 McInnes, L., Healy, J., and Melville, J.J.a.p.a. (2018). Umap: Uniform manifold  
760 approximation and projection for dimension reduction.
- 761 Mori, L., Lepore, M., and De Libero, G. (2016). The Immunology of CD1- and MR1-  
762 Restricted T Cells. *Annual Review of Immunology* 34, 479-510.
- 763 Nagarsheth, N., Wicha, M.S., and Zou, W. (2017). Chemokines in the cancer  
764 microenvironment and their relevance in cancer immunotherapy. *Nat Rev Immunol*  
765 17, 559-572.
- 766 Perfetto, S.P., Ambrozak, D., Nguyen, R., Chattopadhyay, P.K., and Roederer, M.  
767 (2012). Quality assurance for polychromatic flow cytometry using a suite of  
768 calibration beads. *Nature protocols* 7, 2067-2079.
- 769 Peterson, V.M., Zhang, K.X., Kumar, N., Wong, J., Li, L., Wilson, D.C., Moore, R.,  
770 McClanahan, T.K., Sadekova, S., and Klappenbach, J.A. (2017). Multiplexed  
771 quantification of proteins and transcripts in single cells. *Nat Biotechnol* 35, 936-939.
- 772 Phillips, J., and Eberwine, J.H. (1996). Antisense RNA Amplification: A Linear  
773 Amplification Method for Analyzing the mRNA Population from Single Living Cells.  
774 *Methods* 10, 283-288.

- 775 Sallusto, F., Geginat, J., and Lanzavecchia, A. (2004). Central memory and effector  
776 memory T cell subsets: function, generation, and maintenance. *Annu Rev Immunol*  
777 *22*, 745-763.
- 778 Sallusto, F., Lenig, D., Förster, R., Lipp, M., and Lanzavecchia, A. (1999). Two subsets  
779 of memory T lymphocytes with distinct homing potentials and effector functions.  
780 *Nature* *401*, 708-712.
- 781 Schwanhausser, B., Busse, D., Li, N., Dittmar, G., Schuchhardt, J., Wolf, J., Chen, W.,  
782 and Selbach, M. (2011). Global quantification of mammalian gene expression  
783 control. *Nature* *473*, 337-342.
- 784 See, P., Dutertre, C.-A., Chen, J., Günther, P., McGovern, N., Irac, S.E., Gunawan, M.,  
785 Beyer, M., Händler, K., Duan, K., *et al.* (2017). Mapping the human DC lineage  
786 through the integration of high-dimensional techniques. *Science* *66*, eaag3009.
- 787 Slichter, C.K., McDavid, A., Miller, H.W., Finak, G., Seymour, B.J., McNevin, J.P., Diaz,  
788 G., Czartoski, J.L., McElrath, M.J., Gottardo, R., *et al.* (2016). Distinct activation  
789 thresholds of human conventional and innate-like memory T cells. *JCI Insight* *1*.
- 790 Stoeckius, M., Hafemeister, C., Stephenson, W., Houck-Loomis, B., Chattopadhyay,  
791 P.K., Swerdlow, H., Satija, R., and Smibert, P. (2017). Simultaneous epitope and  
792 transcriptome measurement in single cells. *Nature Methods* *14*, 865-868.
- 793 Stoeckius, M., Zheng, S., Houck-Loomis, B., Hao, S., Yeung, B.Z., Mauck, W.M., 3rd,  
794 Smibert, P., and Satija, R. (2018). Cell Hashing with barcoded antibodies enables  
795 multiplexing and doublet detection for single cell genomics. *Genome Biol* *19*, 224.
- 796 Stuart, T., and Satija, R. (2019). Integrative single-cell analysis. *Nat Rev Genet* *20*, 257-  
797 272.
- 798 van den Broek, T., Borghans, J.A.M., and van Wijk, F. (2018). The full spectrum of  
799 human naive T cells. *Nat Rev Immunol* *18*, 363-373.
- 800 Villani, A.-C., Satija, R., Reynolds, G., Sarkizova, S., Shekhar, K., Fletcher, J.,  
801 Griesbeck, M., Butler, A., Zheng, S., Lazo, S., *et al.* (2017). Single-cell RNA-seq  
802 reveals new types of human blood dendritic cells, monocytes, and progenitors.  
803 *Science* *356*, 1-12.
- 804 Zheng, G.X.Y., Terry, J.M., Belgrader, P., Ryvkin, P., Bent, Z.W., Wilson, R., Ziraldo,  
805 S.B., Wheeler, T.D., McDermott, G.P., Zhu, J., *et al.* (2017). Massively parallel digital  
806 transcriptional profiling of single cells. *Nature communications* *8*, 14049.
- 807 Zhou, L., Chong, M.M.W., and Littman, D.R. (2009). Plasticity of CD4+ T cell lineage  
808 differentiation. *Immunity* *30*, 646-655.
- 809

Figure 1

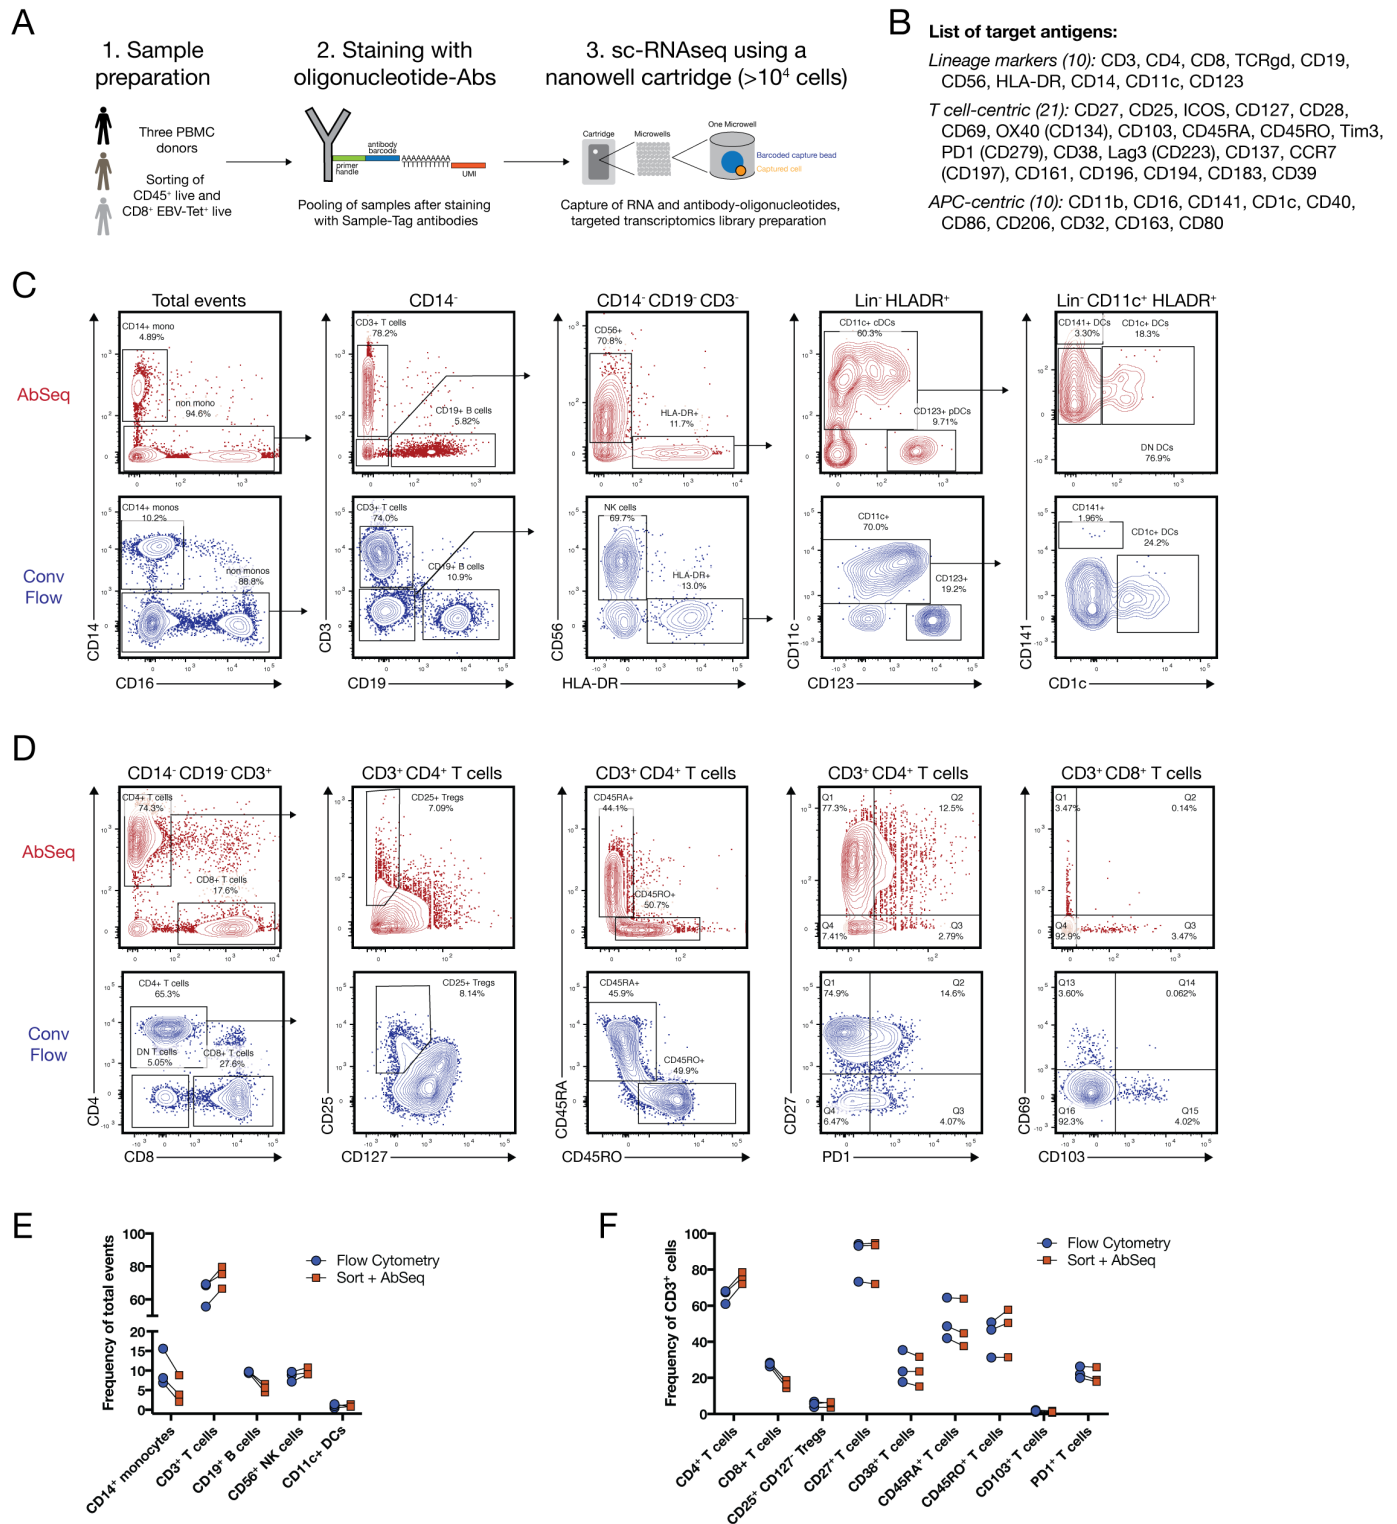

**Figure 1: Comparison of oligo-nucleotide antibody probes to high-dimensional flow cytometry.**

(A) Schematic graph describing the workflow of the experiment. PBMC samples from three donors were split in half, with one aliquot used for the multi-omic workflow, and one aliquot used for flow cytometry phenotyping using two 30-parameter panels.

(B) Overview of antibody targets used in both the multi-omic and conventional flow cytometry experiment.

(C) Manual gating of main immune subsets using the combined AbSeq data set (upper panel, red) and concatenated and down-sampled events (27,000 cells) from the conventional (conv) flow cytometry data set (lower panel, blue).

(D) Manual gating of various T cell markers using the combined AbSeq data set (upper panel, red) and concatenated, down-sampled events from the cytometry data set (lower panel, blue).

(E) Quantification of main immune subsets in the AbSeq and flow cytometry data set across the three different donors.

(F) Quantification of main T cell populations and selected phenotyping markers in the AbSeq and flow cytometry data set across the three different donors.

Figure 2

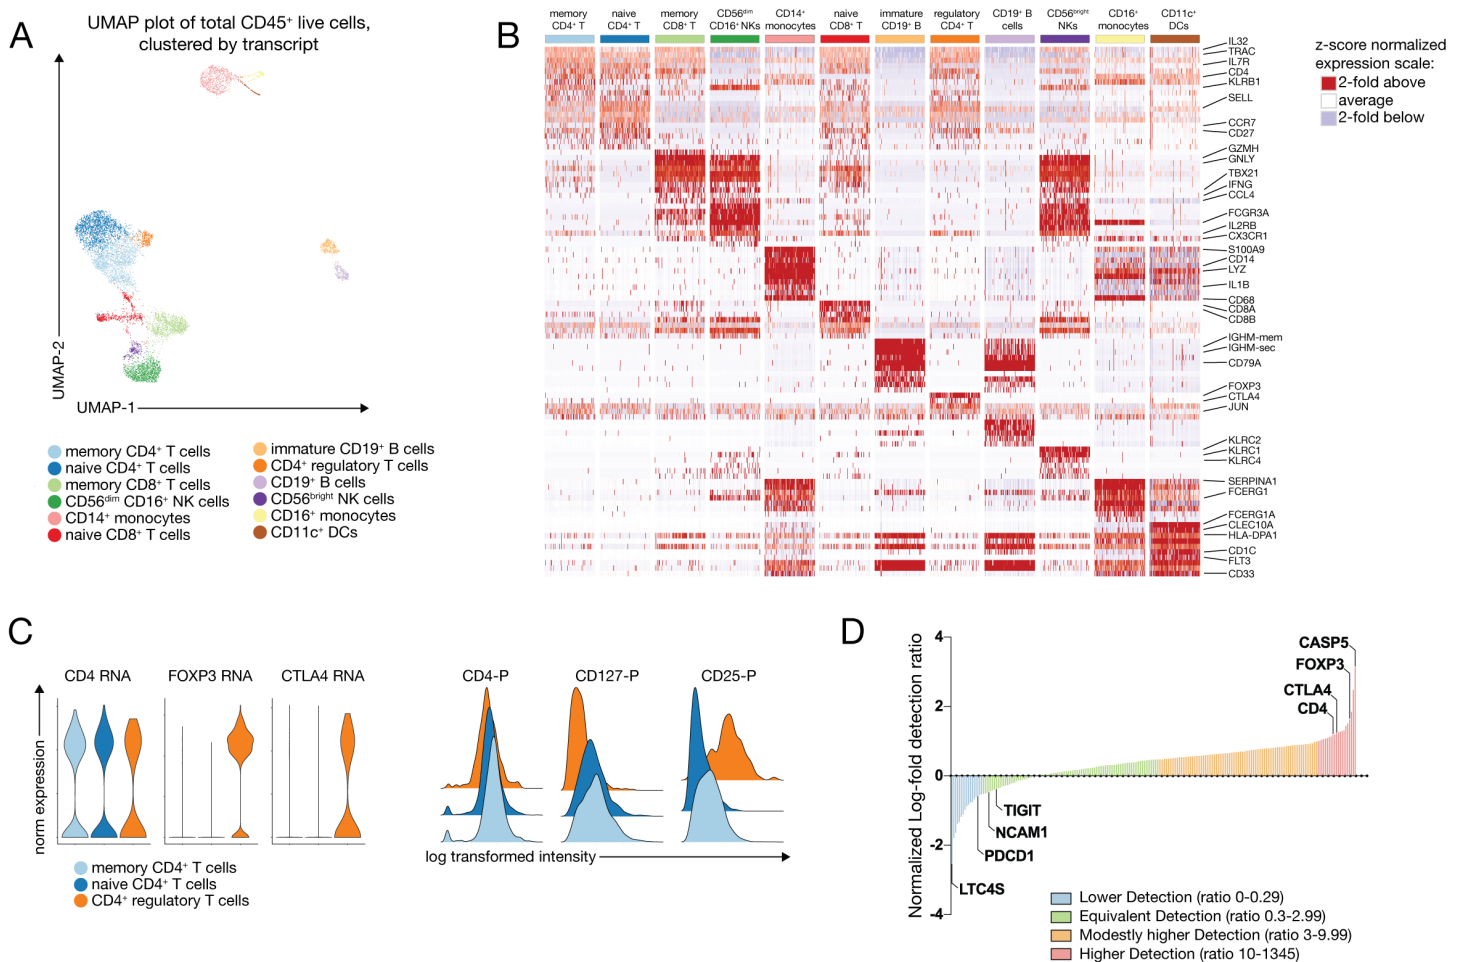

**Figure 2: Targeted transcriptomics faithfully captures cellular heterogeneity in peripheral blood mononuclear cells.**

(A) Graph-based clustering of the transcript data from one representative donor is shown on a UMAP (uniform manifold approximation projection) plot. Clusters have been annotated by expression of key lineage genes.

(B) The top 10-differentially expressed genes for each cluster were identified using the Seurat implementation of MAST (model-based analysis of single-cell transcriptomes) and visualized on a heatmap after z-score normalization. Cluster names are shown in the same color scheme as in (A).

(C) Expression of the indicated transcripts and proteins on the three different CD4<sup>+</sup> T cell clusters, highlighting the CD25<sup>+</sup> CD127<sup>low</sup> Treg cluster.

(D) Relative detection ratio of all detected transcripts relative to a whole transcriptome data set from the same donor. Genes are manually assigned into four different groups according to their relative detection ratio.



Figure 3

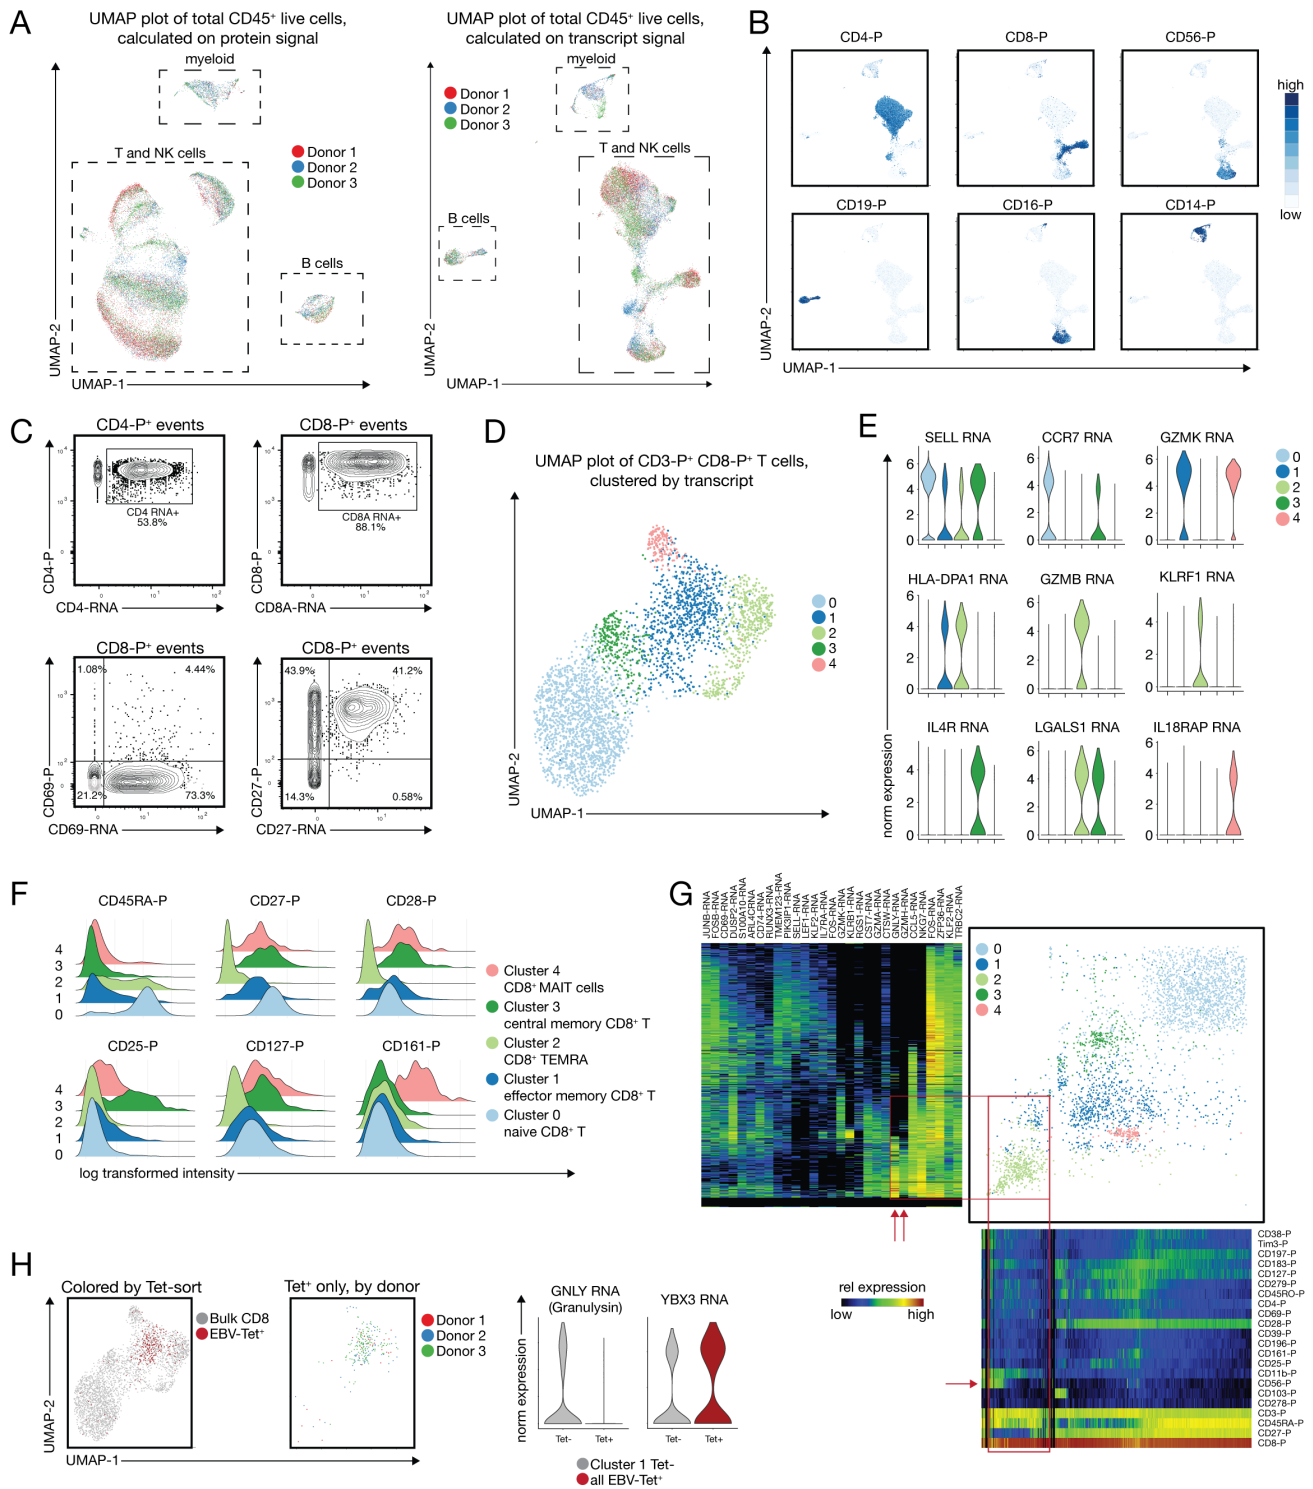

**Figure 3: Multi-omic targeted transcriptomics identifies canonical memory T cell populations and allows the study of rare-antigen specific CD8<sup>+</sup> T cells**

(A) UMAP plots calculated on protein (left) or transcript (right) show that there is no batch effect across the three donors analyzed.

(B) Example UMAP plots (calculated on transcript) representing the expression of the main immune lineage protein markers which allow the unequivocal identification of CD4<sup>+</sup> and CD8<sup>+</sup> T cells, CD19<sup>+</sup> B cells, and CD14<sup>+</sup> as well as CD16<sup>+</sup> myeloid cells.

(C) Example plots showing the poor correlation of transcript and protein levels for CD4 and CD69, and good correlation for CD8 and CD27. Protein signal is plotted on the y-axis, transcript on the x-axis.

(D) UMAP plot and graph-based clustering of the CD3<sup>+</sup> CD8<sup>+</sup> CD4<sup>-</sup> T cell compartment, revealing 5 distinct populations. (E) Examples of top differentially expressed genes identified by MAST for each of the 5 clusters highlighted in (D).

(F) Protein signatures of the 5 clusters identified canonical naive and memory CD8<sup>+</sup> T cell subsets, including mucosal associated invariant T cells (MAIT cells).

(G) One-SENSE plot depicting protein expression heatmap along the x-axis, and transcript expression heatmap of the top differentially expressed genes along the y-axis.

(H) Identification of EBV-specific CD8<sup>+</sup> T cells relative to all CD8<sup>+</sup> T cells, and expression pattern of two differentially expressed genes between Tetramer-positive cells and Tetramer negative cells in the effector memory cluster 1.

Figure 4

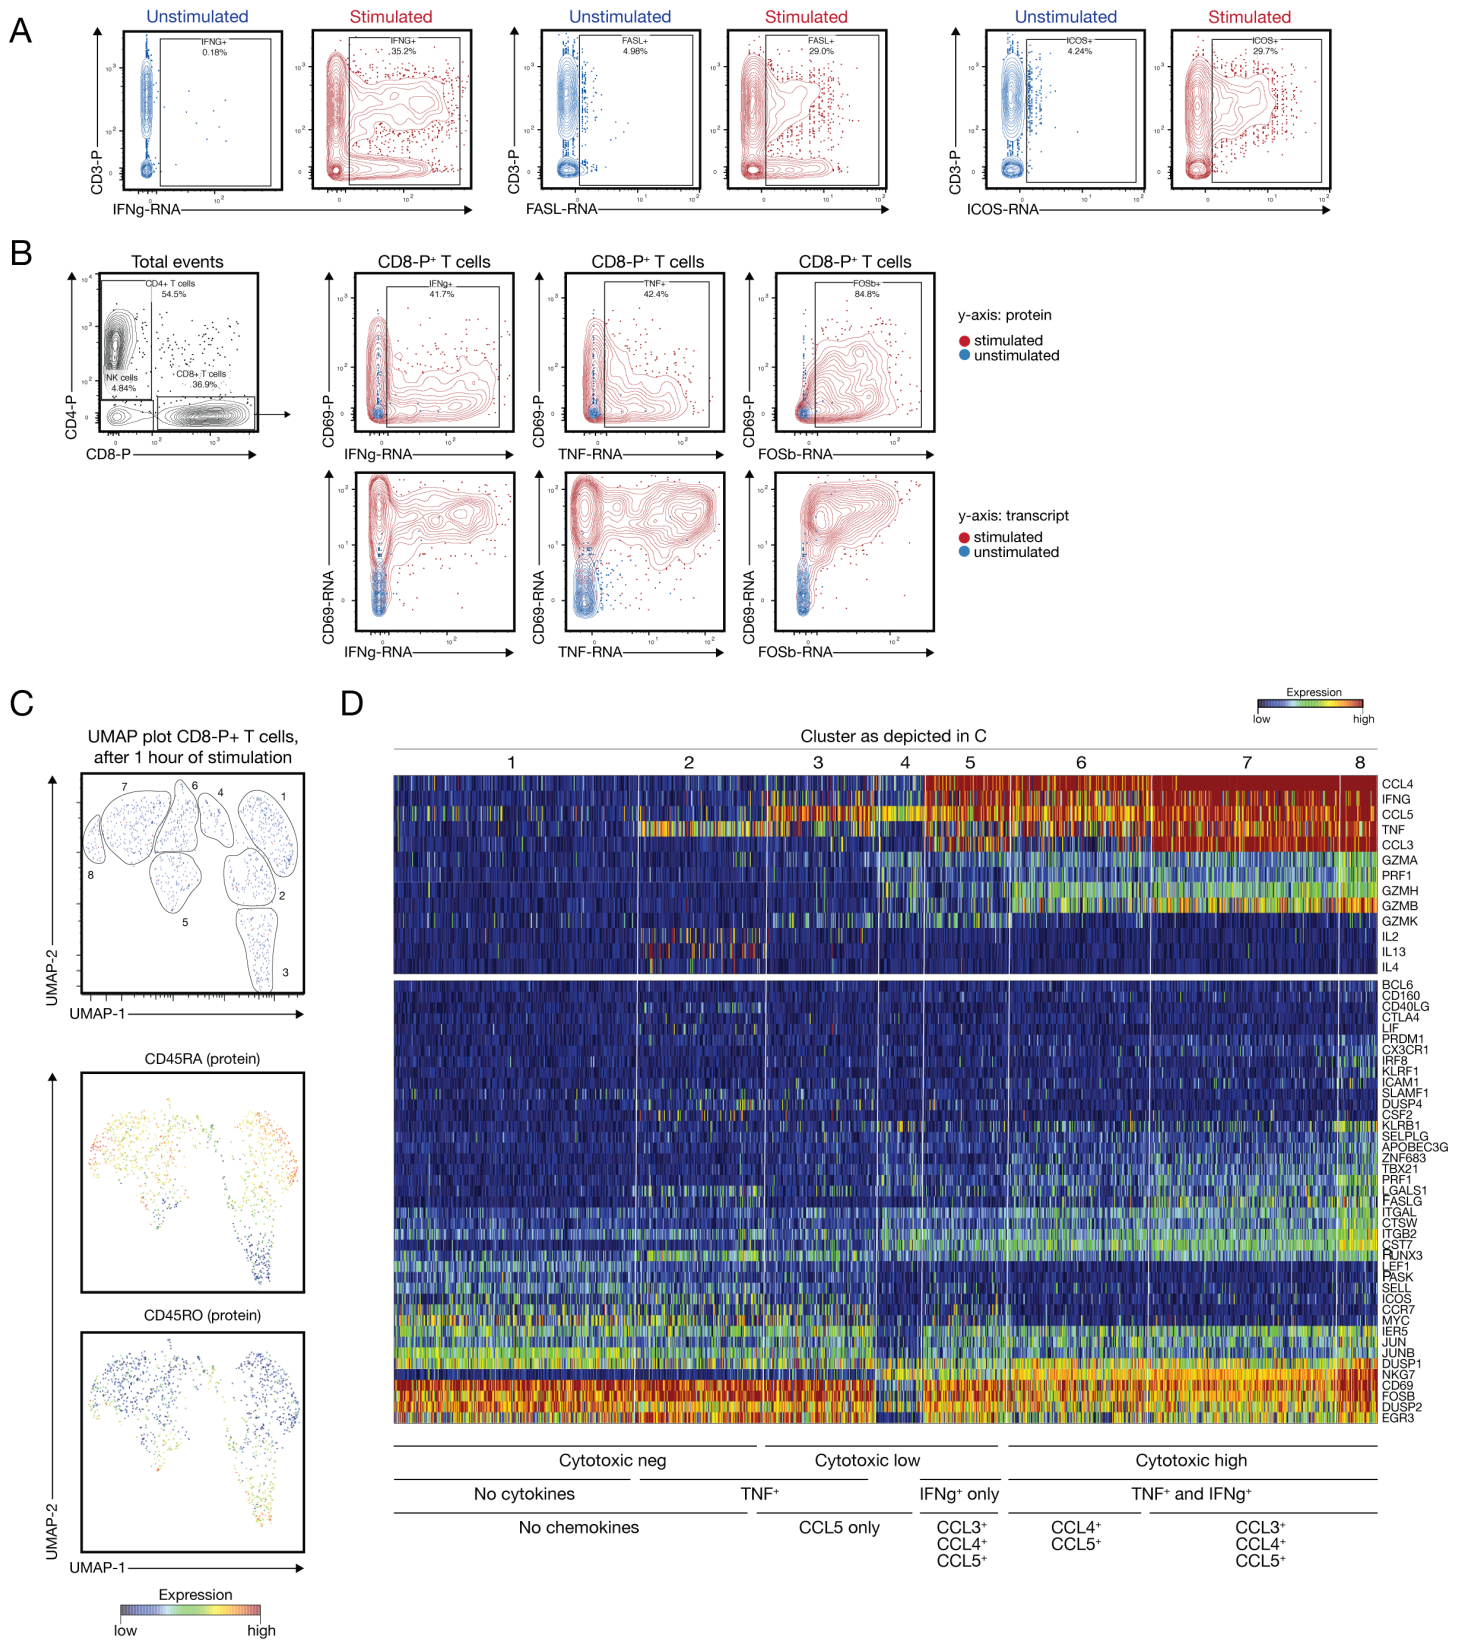

**Figure 4: Multi-omic analysis of the T and NK cell compartment 1 hour after stimulation**

(A) Representative plots showing the upregulation of selected effector transcripts such as IFNG, FASL and ICOS after stimulation (red) relative to unstimulated cells (blue).

(B) Disconnect between surface protein expression of the early activation marker CD69 and IFNG and TNF transcript within CD8-protein<sup>+</sup> T cells. Blue overlay indicated unstimulated cells, red stimulated cells.

(C) UMAP plot of CD8-protein<sup>+</sup> T cells with manually identified clusters, and CD45RA and CD45RO protein expression.

(D) Heatmap showing the expression of key effector transcripts within the clusters identified in (C).

Figure 5

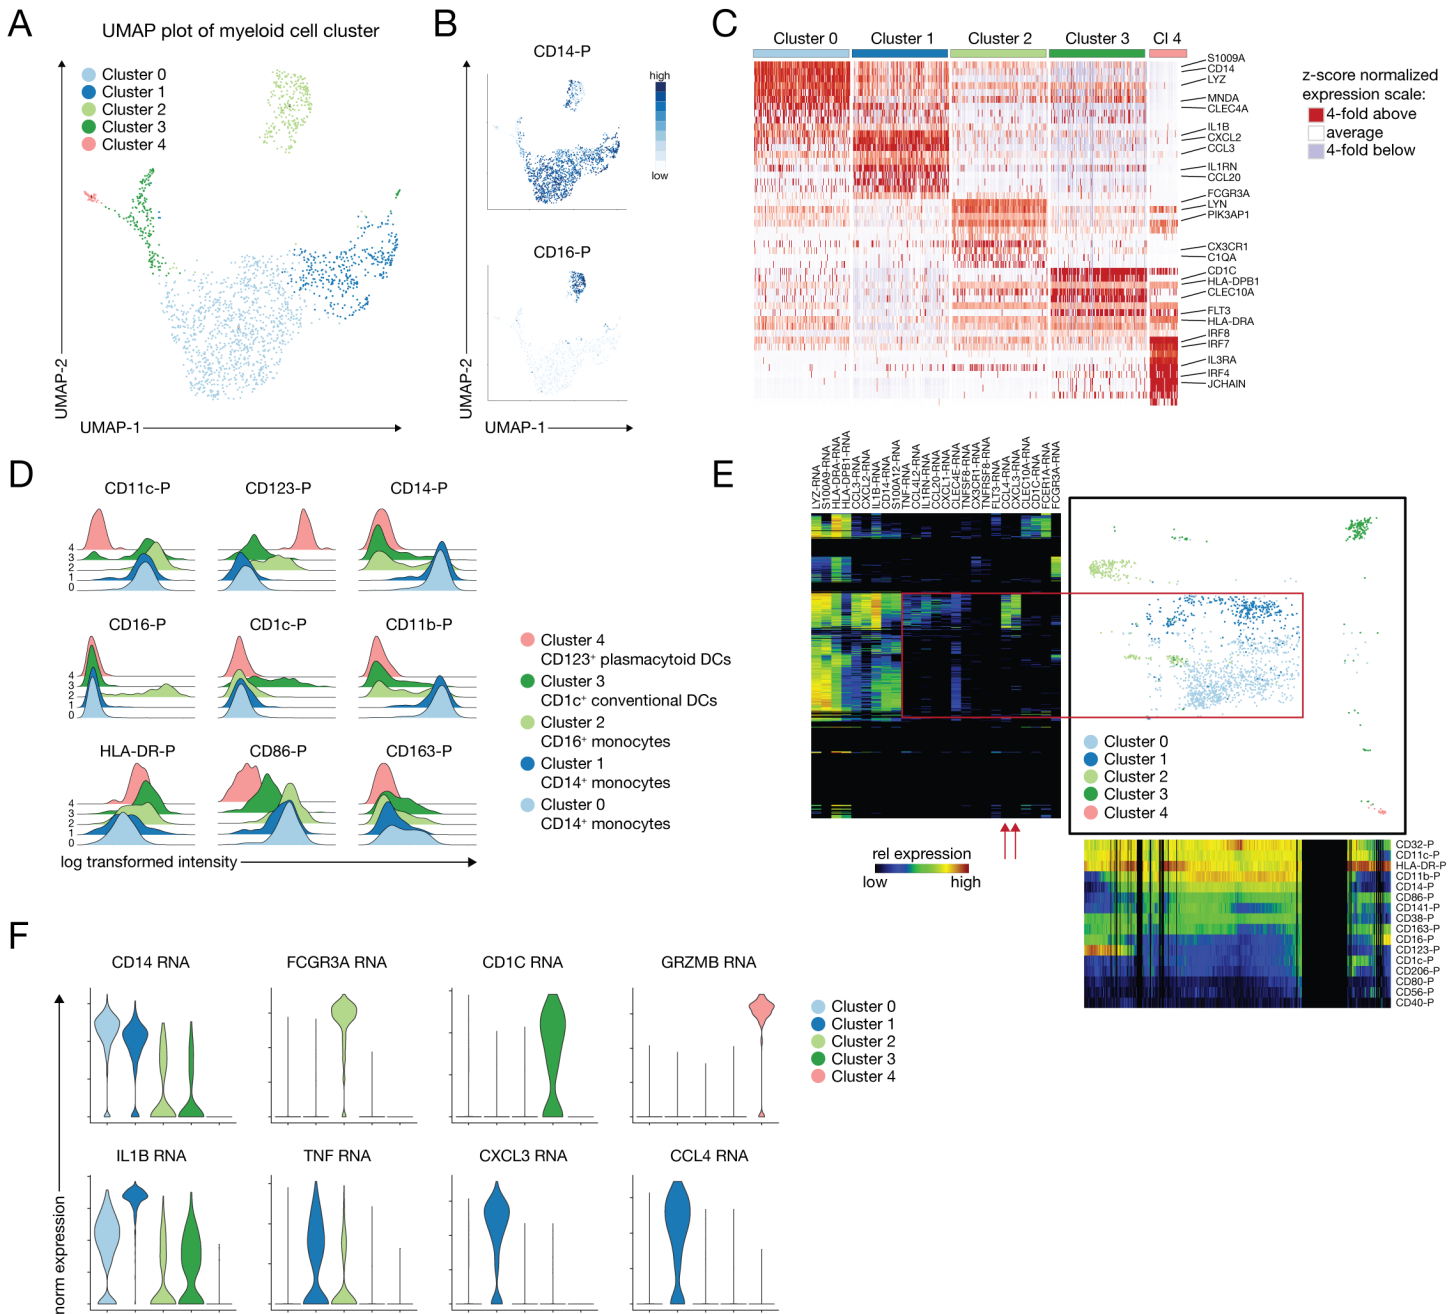

**Figure 5: Combined protein and transcript phenotyping of the peripheral myeloid compartment reveals inflammatory subsets not captured by surface protein phenotype**

- (A) UMAP plot and graph-based clustering of the peripheral non T/non NK/non B cell compartment, revealing 5 distinct populations.
- (B) Heatmap overlay of CD14- and CD16-protein expression.
- (C) Heatmap of the top differentially expressed genes identified by MAST for each of the 5 clusters highlighted in (A).
- (D) Protein signatures of the 5 clusters identifies canonical CD123<sup>+</sup> plasmacytoid DCs, CD1c<sup>+</sup> conventional DCs and CD16<sup>+</sup> monocytes, but two of the clusters mapping to CD14<sup>+</sup> monocytes.
- (E) One-SENSE plot depicting protein expression heatmap along the x-axis, and transcript expression heatmap of some of the top differentially expressed genes along the y-axis. Red box and arrows are highlighting the differentially expressed genes between cluster 0 and 1.
- (F) Violin plots showing key genes of the respective myeloid population (upper panel) and differentially expressed genes between cluster 0 and 1, suggesting the presence of an inflammatory subpopulation within CD14<sup>+</sup> CD16<sup>-</sup> monocytes that expresses high levels of IL1B, TNF, CXCL3 and CCL4.

## Suppl. Figure 1

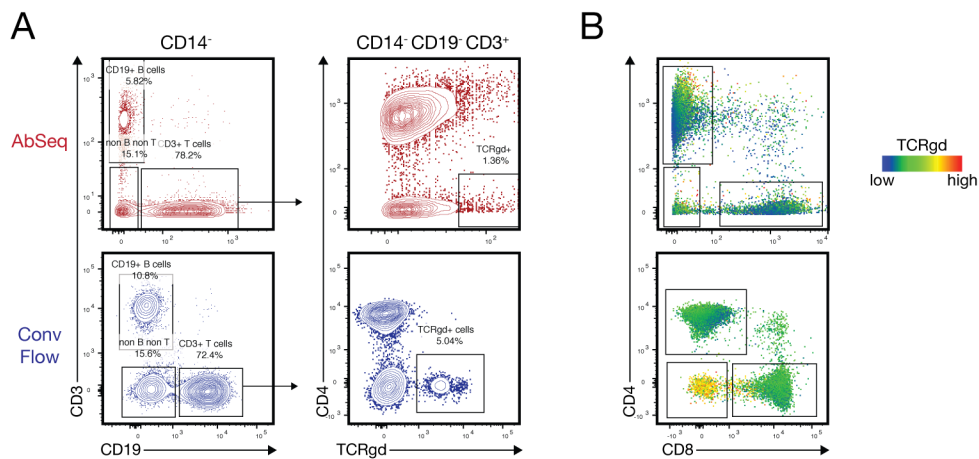

### Supplementary figure 1: Example for a poorly performing reagent

**(A)** Manual gating of main immune subsets using the combined AbSeq data set (upper panel, red) and concatenated and downsampled events from the flow cytometry data set (lower panel, blue), highlighting the population of  $\gamma\delta$  T cells. **(B)** Heatmap overlay of the TCR $\gamma\delta$  signal on a CD4 vs CD8 plot for the AbSeq data set (upper panel) and flow cytometry data set (lower panel).

Suppl Figure 2

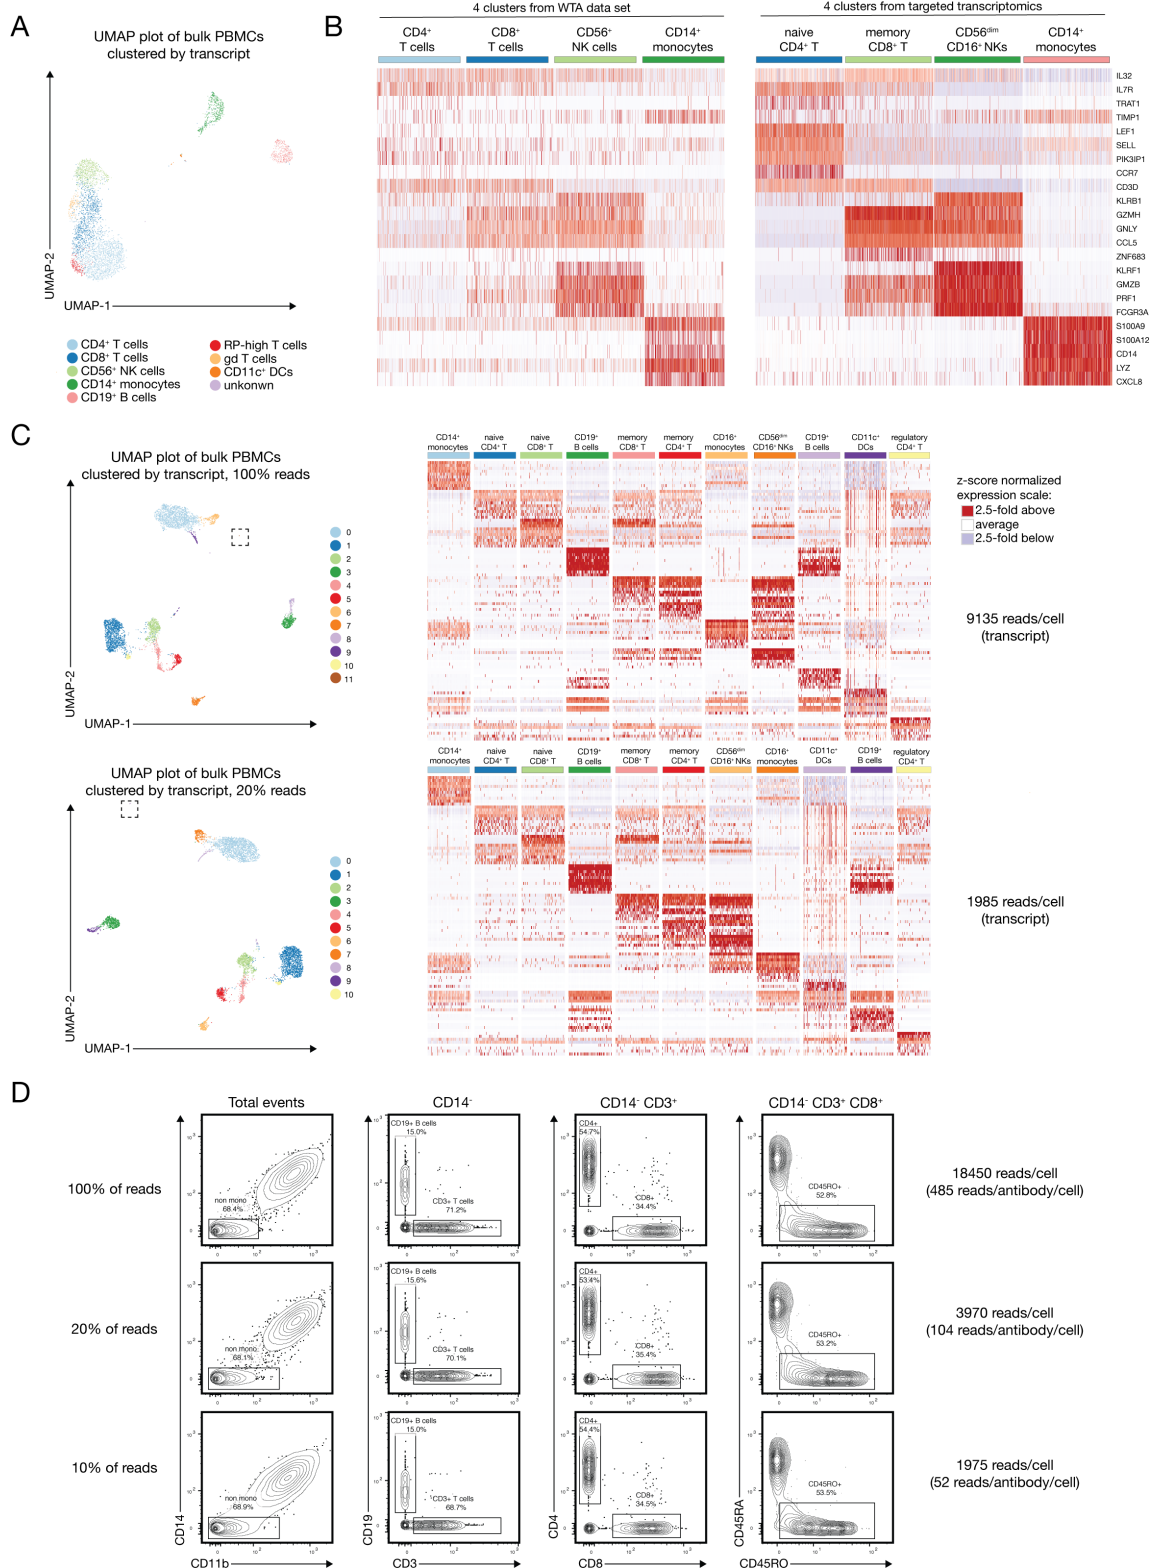

**Supplementary figure 2: Comparison of targeted transcriptomics to whole transcriptome data (WTA) and assessment of required sequencing depth**

(A) Graph-based clustering of WTA data obtained from the same donor as in main Figure 2.

(B) Four of the clusters that matched most closely in terms of their expression pattern were selected from both experiments and plotted using the top differentially expressed genes obtained from the targeted transcriptomics approach. Heatmap represents relative expression after z-score normalization. Left plot shows WTA data, right plot shows targeted transcriptomics (cells obtained from the same donor).

(C) 5,400 cells from a different donor were sequenced at a total depth of approximately 30,000 reads/cell. Upper panel depicts UMAP plot after graph-based clustering and a heatmap of the top differentially expressed genes (z-score normalized expression) at full read depth, lower panel using only 20% of the reads. Read depth per cell for the transcript library is indicated on the right. Squared box on the UMAP plot indicates one cluster that is separated as cluster 11 at full read depth, but pooled with cluster 8 at lower read-depth

(D) Protein signals at the indicated read depths.
